# Supplementary material
Source: PubMed Central journal article supplement (PMC5683167)
Supplement: NIHMS914167-supplement-supp_1.pdf [file NIHMS914167-supplement-supp_1.pdf]

1 **SUPPLEMENTAL:**

2 **Table 1: Attenuation of recombinant viruses, expressed as peak titer differences for each**  
 3 **recombinant virus relative to wild type [ $\log_{10}(\text{recombinant}/\text{WT})$ ], estimated by linear**  
 4 **regression. Differences are expressed in  $\log_{10}(\text{IU}/\text{mL})$ .**

| Virus                | Vero                      |         | C6/36                     |         |
|----------------------|---------------------------|---------|---------------------------|---------|
|                      | Difference from Wild Type | p value | Difference from Wild Type | p value |
| WNV $\Delta$ Ctrl-1  | -0.287                    | 0.032   | 0.252                     | 0.701   |
| WNV $\Delta$ Ctrl-2a | -0.644                    | < 0.001 | < 0.001                   | 1.000   |
| WNV $\Delta$ Ctrl-2b | -0.187                    | 0.149   | -0.527                    | 0.426   |
| WNV $\Delta$ Ctrl-3  | -0.767                    | < 0.001 | 0.385                     | 0.559   |
| WNV $\Delta$ Vax-1   | -0.290                    | 0.031   | -3.186                    | < 0.001 |
| WNV $\Delta$ Vax-2a  | -0.603                    | < 0.001 | -3.382                    | < 0.001 |
| WNV $\Delta$ Vax-2b  | -0.392                    | 0.005   | -5.897                    | < 0.001 |
| WNV $\Delta$ Vax-3   | -0.920                    | < 0.001 | -4.969                    | < 0.001 |

5  
 6 **Table 2: P values for two-sample *t* test of peak titers, control compared to vaccine viruses.**

| Virus           | Vero  | C6/36   |
|-----------------|-------|---------|
| WNV $\Delta$ 1  | 0.975 | 0.049   |
| WNV $\Delta$ 2a | 0.604 | 0.001   |
| WNV $\Delta$ 2b | 0.361 | < 0.001 |
| WNV $\Delta$ 3  | 0.220 | < 0.001 |

7

8 **Table 3: Mean differences in Vero cell plaque sizes for each recombinant virus relative to**  
9 **wild type [Recombinant - WT], estimated by linear regression. Differences in plaque**  
10 **diameters are expressed in mm, with negative values indicating smaller plaques.**

| Virus                | Difference from<br>Wild Type | p value |
|----------------------|------------------------------|---------|
| WNV $\Delta$ Ctrl-1  | -0.310                       | 0.093   |
| WNV $\Delta$ Ctrl-2a | -1.600                       | < 0.001 |
| WNV $\Delta$ Ctrl-2b | -1.810                       | < 0.001 |
| WNV $\Delta$ Ctrl-3  | -1.844                       | < 0.001 |
| WNV $\Delta$ Vax-1   | -0.673                       | < 0.001 |
| WNV $\Delta$ Vax-2a  | -0.979                       | < 0.001 |
| WNV $\Delta$ Vax-2b  | -0.906                       | < 0.001 |
| WNV $\Delta$ Vax-3   | -1.884                       | < 0.001 |

11

12 **Table 4: *P* values for two-sample *t* test of plaque sizes, control compared to vaccine viruses.**

| Virus           | Vero  |
|-----------------|-------|
| WNV $\Delta$ 1  | 0.219 |
| WNV $\Delta$ 2a | 0.028 |
| WNV $\Delta$ 2b | 0.001 |
| WNV $\Delta$ 3  | 0.644 |

13

14
