# Supplementary material
Source: PubMed Central journal article supplement (PMC5683167)
Supplement: NIHMS914167-supplement-supp_2.pdf [file NIHMS914167-supplement-supp_2.pdf]

GCCGGCAAGAGCTGAGATGTGGAAGTGGAGTGTTACATACACAATGATGTGGAGGCTTGG  
ATGGACCGGTACAAGTATTACCTGAAACGCCACAAGGCCTAGCCAAGATCATTTCAGAAA  
GCTCATAAGGAAGGAGTGTGCGGTCTACGATCAGTTTCCAGACTGGAGCATCAAATGTG  
GGAAGCAGTGAAGGACGAGCTGAACACTCTTTTGAAGGAGAATGGTGTGGACCTTAGTG  
TCGTGGTTGAGAAACAGGAGGGAATGTACAAGTCAGCACCTAAACGCCTCACCGCCACCA  
CGGAAAAATTGGAATTTGGCTGGAAGGCCTGGGGAAAGAGTATTTTATTTGCACCAGAA  
CTCGCCAACAACACCTTTGTGGTTGATGGTCCGGAGACCAAGGAATGTCCGACTCAGAAT  
CGCGCTTGAATAGCTTAGAAGTGGAGGATTTTGGATTTGGTCTCACCGACTCGGATG  
TTCCTGAAGGTCAGAGAGAGCAACACAACCTGAATGTGACTCGAAGATCATTGGAACGGC  
TGTCAGAACAACCTTGGCGATCCACAGTGACCTGTCTTATTGGATTGAAAGCAGGCTCAA  
TGATACGTGGAAGCTTGAAGGGCAGTCTGGGTGAAGTCAAATCATGTACGTGGCCTG  
AGACGCATACCTTGTGGGGCGATGGAATCCTTGAGAGTGACTTGATAATACCAGTCACAC  
TGGCGGGACCACGAAGCAATCACAATCGGAGACCTGGGTACAAGACACAAAACCAGGGCC  
CATGGGACGAAGGCCGGGTAGAGATTGACTTCGATTACTGCCAGGAACTACGGTCACCC  
TGAGTGAGAGCTGCGGACACCGTGGACCTGCCACTCGCACCACCACAGAGAGCGGAAAGT  
TGATAACAGATTGGTGTGCTGCAGGAGCTGCACCTACCACCCTGCGCTACCAAACCTGACA  
GCGGCTGTTGGTATGGTATGGAGATCAGACCACAGAGACATGATGAAAAGACCCTCGTG  
CAGTCACAAGTGAATGCTTATAATGCTGATATGATTGACCCTTTTCAGTTGGGCCTTCTG  
GTCGTGTTCTTGGCCACCCAGGAGTCTTTCGCAAGAGGTGGACAGCCAAGATCAGCATG  
CCAGCTATACTGATTGCTCTGCTAGTCCTGGTGTGGGGGCATTACTTACACTGATGTG  
TTACGCTATGTCATCTTGGTGGGGGCGAGCTTTCGCAGAATCTAATTCGGGAGGAGACGTG  
GTACACTTGGCGCTCATGGCGACCTTCAAGATACAACCAGTGTTTATGGTGGCATCGTTT  
CTCAAAGCGAGATGGACCAACCAGGAGAACATTTTGTGATGTTGGCGGCTGTTTTCTTT  
CAAATGGCTTATTACGATGCCCGCCAAATTTCTGCTCTGGGAGATCCCTGATGTGTTGAAT  
TCACTGGCGGTAGCTTGGATGATACTGAGAGCCATAACATTCACAACGACATCAAACGTG  
GTTGTTCCGCTGCTAGCCCTGCTAACACCCGGGCTGAGATGCTTGAATCTGGATGTGTAC  
AGGATACTGCTGTTGATGGTCCGAATAGGCAGCTTGCATCAGGGAGAAGAGGAGTGCAGC  
TGCAAAAAGAAAGGAGCAAGTCTGCTATGCTTGGCTCTAGCCTCAACAGGACTTTTCA  
ACCCCATGATCCTTGTGCTGGACTGATTGCATGTGATCCCAACCGTAAACGCGGATGGC  
CCGCAACTGAAGTGATGACAGCTGTGCGCCTAATGTTTGCCATCGTCGGAGGGCTGGCAG  
AGCTTGACATTGACTCCATGGCCATTCCAATGACTATCGCGGGGCTCATGTTTGTGCTGCTT  
TCGTGATTTCTGGGAAATCAACAGATATGTGGATTGAGAGAACGGCGGACATTTCTGG  
GAAAGTGATGCAGAAATTACAGGCTCGAGCGAAAGAGTTGATGTGCGGCTTGATGATGA  
TGAAACTTCCAGCTCATGAATGATCCAGGAGCACCTTGAAGATATGGATGCTCAGAA  
TGGTCTGTCTCGGATTAGTTCGTACACCCCTGGGCAATCTTGCCCTCAGTAGTTGGAT  
TTTGGATAACTCTCCAATACACAAAGAGAGGAGGCGTGTGTGGGACACTCCCTCACCAA  
AGGAGTACAAAAGGGGGACACGACCACCGGCTCTACAGGATCATGACTCGTGGGCTGC  
TCGGCAGTTATCAAGCAGGAGCGGGCGTGATGGTTGAAGGTGTTTTCCACACCCTTTGGC  
ATACAACAAAAGGAGCCGCTTTGATGAGCGGAGAGGGCCGCTGGACCCATACTGGGGCA  
GTGTCAAGGAGGATCGACTTTGTTACGGAGGACCCTGGAAATTGCAGCACAAGTGAAC  
GGGACAGGATGAGGTGCAGATGATTGTGGTGAACCTGGCAGGAACGTTAAGAACGTCCA  
GACGAAACCAGGGGTGTTCAAAACACCTGAAGGAGAAATCGGGGCCGTGACTTTGGACT  
TCCCCACTGGAACATCAGGCTCACCAATAGTGGACAAAAACGGTGTGATGATTGGGCTTT  
ATGGCAATGGAGTCATAATGCCAACGGCTCATACATAAGCGCGATAGTGCAGGGTGAA  
AGGATGGATGAGCCAATCCAGCCGATTCGAACCTGAGATGCTGAGGAAAAACAGAT  
CACTGTACTGGATCTCCATCCCGGCCCGGTAACAAGGAGGATTCTGCCACAGATCAT

CAAAGAGGCCATAAACAGAAGACTGAGAACAGCCGTGCTAGCACCAACCAGGGTTGTGG  
CTGCTGAGATGGCTGAAGCACTGAGAGGACTGCCCATCCGGTACCAGACATCCGCAGTGC  
CCAGAGAACATAATGGAAATGAGATTGTTGATGTCATGTGTCATGCTACCCTCACCCACA  
GGCTGATGTCTCCTCACAGGGTGCCGAAC TACAACCTGTTCTGATGGATGAGGCTCATT  
TCACCGACCCAGCTAGCATTGCAGCAAGAGGTTACATTTCCACAAAGGTCGAGCTAGGGG  
AGGCGGCGGCAATATTCATGACAGCCACCCACCAGGCACTTCAGATCCATTCCCAGAGT  
CCAATTCACCAATTTCCGACTTACAGACTGAGATCCCGGATCGAGCTTGGAAC TCTGGAT  
ACGAATGGATCACAGAATACACCGGGAAGACGGTTTTGGTTTTGTGCCTAGTGTCAAGATG  
GGGAATGAGATTGCCCTTTGCCTACAACGTGCTGGAAAGAAAGTAGTCCAATTGAACAG  
AAAGTCGTACGAGACGGAGTACCCAAAATGTAAGAACGATGATTGGGACTTTGTTATCA  
CAACAGACATATCTGAAATGGGGGCTAACTTCAAGGCGAGCAGGGTGATTGACAGCCGG  
AAGAGTGTGAAACCAACCATCATAACAGAAGGAGAAGGGAGAGTGATCCTGGGAGAACC  
ATCTGCAGTGACAGCAGCTAGTGCCGCCAGAGACGTGGACGTATCGGTAGAAATCCGTC  
GCAAGTTGGTGATGAGTACTGTTATGGGGGACACGAATGAAGACGACTCGAACTTCG  
CCCATTGGACTGAGGCACGAATCATGCTGGACAACATCAACATGCCAAACGGACTGATCG  
CTCAATTCTACCAACCAGAGCGTGAGAAGGTATATACCATGGATGGGGAATACCGGCTCA  
GAGGAGAAGAGAGAAAAAACTTTCTGGAAGTGTGAGGACTGCAGATCTGCCAGTTTGG  
CTGGCTTACAAGGTTGCAGCGGCTGGAGTGTACATACCACGACCGGAGGTGGTGCTTTGAT  
GGTCTAGGACAAACACAATTTTAGAAGACAACAACGAAGTGGAAGTCATCACGAAGCT  
TGGTGAAAGGAAGATTCTGAGGCCGCGCTGGATTGACGCCAGGGTGTACTCGGATCACCA  
GGCACTAAAGGCGTTCAAGGACTTCGCCTCGGGAAAACGTTCTCAGATAGGGCTCATTGA  
GGTCTGGGAAAGATGCCTGAGCACTTCATGGGGAAGACATGGGAAGCACTTGACACCA  
TGTACGTTGTGGCCACTGCAGAGAAAGGAGGAAGAGCTCACAGAATGGCCCTGGAGGAA  
CTGCCAGATGCTCTTCAGACAATTGCCTTGATTGCCTTATTGAGTGTGATGACCATGGGA  
GTATTCTTCCTCCTCATGCAGCGGAAGGGCATTGGAAGATAGGTTTGGGAGGCGCTGTC  
TTGGGAGTCGCGACCTTTTTCTGTTGGATGGCTGAAGTTCAGGAACGAAGATCGCCGGA  
ATGTTGCTGCTCTCCCTTCTTTGATGATTGTGCTAATTCCTGAGCCAGAGAAGCAACGT  
TCGCAGACAGACAACCAGCTAGCCGTGTTCCCTGATTTGTGTCATGACCCTTGTGAGCGCA  
GTGGCAGCCAACGAGATGGGTTGGCTAGATAAGACCAAGAGTGACATAAGCAGTTTGT  
TGGGCAAAGAATTGAGGTCAAGGAGAATTTAGCATGGGAGAGTTTCTTTTGGACTTGA  
GGCCTGCAACAGCCTGGTCACTGTACGCTGTGACAACAGCGGTCCTCACTCCACTGCTAA  
AGCATTGATCACGTCAGATTACATCAACACCTCATTGACCTCAATAAACGTTCAAGCAA  
GTGCACTATTCACACTCGCGCGAGGCTTCCCCTTCGTCGATGTTGGAGTGTGCGGCTCTCC  
TGCTAGCAGCCGGATGCTGGGGACAAGTCACCCTCACCGTTACGGTAACAGCGGCAACAC  
TCCTTTTTTGGCCACTATGCCTACATGGTTCCCGGTTGGCAAGCTGAGGCAATGCGCTCAG  
CCCAGCGGCGGACAGCGGCCGGAATCATGAAGAACGCTGTAGTGGATGGCATCGTGGCCA  
CGGACGTCCCAGAATTAGAGCGCACCCACACCCATCATGCAGAAGAAAGTTGGACAGATCA  
TGCTGATCTTGGTGTCTCTAGCTGCAGTAGTAGTGAACCCGTCTGTGAAGACAGTACGAG  
AAGCCGGAATTTTGATCACGGCCGAGCGGTGACGCTTTGGGAGAATGGAGCAAGCTCTG  
TTTGGAAACGCAACAACTGCCATCGGACTCTGCCACATCATGCGTGGGGGTTGGTTGTCAT  
GTCTATCCATAACATGGACACTCATAAAGAACATGGAAAAACCAGGACTAAAAAGAGGT  
GGGGCAAAGGACGCACCTTGGGAGAGGTTTGGAAAGAAAGACTCAACCAGATGACAAA  
AGAAGAGTTCACTAGGTACCGCAAAGAGGCCATCATCGAAGTCGATCGCTCAGCGGCAA  
AACACGCCAGGAAAGAAGGCAATGTCCTGGAGGGCATCCAGTCTCTAGGGGCACAGCA  
AAACTGAGATGGCTGGTTCGAACGGAGGTTTCTCGAACCGGTCGGAAAAGTGATTGACCT  
TGGATGTGGAAGAGCGGTTGGTGTACTATATGGCAACCCAAAAAAGAGTCCAAGAAG

TCAGAGGGTACACAAAGGGCGGTCCCGGACATGAAGAGCCCCAACTAGTGCAAAGTTAT  
GGATGGAACATTGTCACCATGAAGAGTGGAGTGGATGTGTTCTACAGACCTTCTGAGTG  
TTGTGACACCCTCCTTTGTGACATCGGAGAGTCTCGTCAAGTGCTGAGGTTGAAGAGCA  
TAGGACGATTCCGGTCTTGAAATGGTTGAGGACTGGCTGCACCGAGGGCCAAGGGAAT  
TTTGGGTGAAGGTGCTCTGCCCTACATGCCGAAAGTCATAGAGAAGATGGAGCTGCTCC  
AACGCCGTATGGGGGGGACTGGTCAGAAACCCACTCTCACGGAATTCACGCACGAGA  
TGTATTGGGTGAGTCGAGCTTCAGGCAATGTGGTACATTCAGTGAATATGACCAGCCAG  
GTGCTCCTAGGAAGAATGGAAAAAGGACCTGGAAGGGACCCAATACGAGGAAGATGT  
AACTTGGGAAGTGGAACCAGGGCGGTGGGAAAACCCCTGCTCAACTCAGACACCAGTA  
AAATCAAGAACAGGATTGAACGACTCAGGCGTGAGTACAGTTCGACGTGGCACCACGAT  
GAGAACCACCCATATAGAACCTGGAACCTATCACGGCAGTTATGATGTGAAGCCCACAGGC  
TCCGCCAGTTCGCTGGTCAATGGAGTGGTCAGGCTCCTCTCAAACCATGGGACACCATC  
ACGAATGTTACCACCATGGCCATGACTGACACTACTCCCTTCGGGCAGCAGCGAGTGTTT  
AAAGAGAAGGTGGACACGAAAGCTCCTGAACCGCCAGAAGGAGTGAAGTACGTGCTCAA  
CGAGACCACCAACTGGTTGTGGGCGTTTTTGGCCAGAGAAAAACGTCCAGAAATGTGCTC  
TCGAGAGGAATTCATAAGAAAGGTCAACAGCAATGCAGCTTTGGGTGCCATGTTTGAAG  
AGCAGAATCAATGGAGGAGCGCCAGAGAAGCAGTTGAAGATCCAAAATTTTGGGAGATG  
GTGGATGAGGAGCGGAGGCACATCTGCGGGGGAATGTCACACTTGCATTTACAACAT  
GATGGGAAAGAGAGAGAAAAAACCCGGAGAGTTCGGAAAGGCCAAGGGAAGCAGAGCCA  
TTTGGTTCATGTGGCTCGGAGCTCGCTTTCTGGAGTTCGAGGCTCTGGGTTTTCTCAATG  
AAGACCACTGGCTTGGAAAGAAAGAACTCAGGAGGAGGTGTCGAGGGCTTGGGCCTCAA  
AACTGGGTACATCCTGCGTGAAGTTGGCACCCGGCCTGGGGCAAGATCTATGCTGAT  
GACACAGCTGGCTGGGACACCCGCATCACGAGAGCTGACTTGGAAAATGAAGCTAAGGT  
GCTTGAGCTGCTTGATGGGGAACATCGGCGTCTTGCCAGGGCCATCATTGAGCTCACCTA  
TCGTCAAAAGTTGTGAAAGTGATGCGCCCGCTGCTGATGGAAGAACCGTCATGGATG  
TTATCTCCAGAGAAGATCAGAGGGGGAGTGGACAAGTTGTCACCTACGCCCTAAACACTT  
TCACCAACCTGGCCGTCCAGCTGGTGAGGATGATGGAAGGGGAAGGAGTGATTGGCCCA  
GATGATGTGGAGAACTCACAAAAGGGAAGGACCCAAAGTCAGGACCTGGCTGTTTGA  
GAATGGGGAAGAAAGACTCAGCCGCATGGCTGTCAGTGGAGATGACTGTGTGGTAAAGC  
CCCTGGACGATCGCTTTGCCACCTCGCTCCACTTCTCAATGCTATGTCAAAGGTTTCGCA  
AAGACATCCAAGAGTGGAACCGTCAACTGGATGGTATGATTGGCAGCAGGTTCCATTT  
TGCTCAAACCATTTCACTGAATTGATCATGAAAGATGGAAGAACACTGGTGGTTCCATG  
CCGAGGACAGGATGAATTGGTAGGCAGAGCTCGCATATCTCCAGGGCCGGATGGAACG  
TCCGCGACACTGCTTGTCTGGCTAAGTCTTATGCCAGATGTGGCTGCTTCTGTACTTCC  
ACAGAAGAGACCTGCGGCTCATGGCCAACGCCATTTGCTCCGCTGTCCCTGTGAATTGGG  
TCCCTACCGGAAGAACCACGTGGTCCATCCATGCAGGAGGAGAGTGGATGACAACAGAG  
GACATGTTGGAGGTCTGGAACCGTGTGGATAGAGGAGAATGAATGGATGGAAGACAA  
AACCCAGTGGAGAAATGGAGTGACGTCCCATATTCAGGAAAACGAGAGGACATCTGGT  
GTGGCAGCCTGATTGGCACAAGAGCCGAGCCACGTGGGCAGAAAACATCCAGGTGGCTA  
TCAACCAAGTCAGAGCAATCATCGGAGATGAGAAGTATGTGGATTACATGAGTTCACTA  
AAGAGATATGAAGACACAACCTTTGGTTGAGGACACAGTACTGTAGATATTTAATCAATT  
GTAAATAGACAATATAAGTATGCATCTTGGCATTACCCGCGTGCCTTACTTGGCATTAC  
CGCGTGCCTTACTTGGCATTACCCGCGTGCCTTAGGCGCGCCTAGGAGAGAGAAAAAGAC  
TGATAGGAGAGAGAAAAAGACTGATAGGAGAGAGAAAAAGACTGACGGACCGAAAAGT  
GTAGTTTTATAGTAGTATTTAGTGGTGTAGTGTAAATAGTTAAGAAAATTTGAGGAG  
AAAGTCAGGCCGGAAGTTCCCGCCACCGAAGTTGAGTAGACGGTGCTGCCTGCGACTC

AACCCAGGAGGACTGGGTGAACAAAGCCGCGAAGTGATCCATGTAAGCCCTCAGAACCG  
TCTCGGAAGGAGGACCCACATGTTGTAACCTCAAAGCCCAATGTCAGACCACGCTACGG  
CGTGCTACTCTGCGGAGAGTGCAGTCTGCGATAGTGCCCCAGGAGGACTGGGTAAACAAA  
GGCAAACCAACGCCCCACGCGGCCCTAGCCCCGTAATGGTGTTAACCAGGGCGAAAGGA  
CTAGAGGTTAGAGGAGACCCCGCGGTTTAAAGTGACAGGCCAGCCTGGCTGAAGCTGTA  
GGTCAGGGGAAGGACTAGAGGTTAGTGGAGACCCCGTGCCACAAAACACCACAACAAAA  
CAGCATATTGACACCTGGGATAGACTAGGAGATCTTCTGCTCTGCACAACCAGCCACACG  
GCACAGTGCGCCGACAATGGTGGCTGGTGGTGGCAGAACACAGGATCTCTAGAGTCGAA  
TTGAAAAAGGAAGAGTATGAGTATTCAACATTTCCGTGTCGCCCTTATCCCTTTTTTGC  
GGCATTTTGCCTTCTGTTTTTGGCTACCCAGAAACGCTGGTGAAGTAAAAGATGCTGA  
AGATCAGTTGGGTGCACGAGTGGGTACATCGAACTGGATCTCAACAGCGGTAAGATCC  
TTGAGAGTTTTTCGCCCCGAAGAAGTTTTCCAATGATGAGCACTTTTAAAGTTCTGCTAT  
GTGGCGGGTATTATCCCGTGTGACGCCGGGCAAGAGCAACTCGGTGCGCCGATACACT  
ATTCTCAGAATGACTTGGTTGAGTACTCACCAGTCACAGAAAAGCATCTTACGGATGGCA  
TGACAGTAAGAGAATTATGCAGTGCTGCCATAACCATGAGTGATAAACTGCGGCCAAC  
TTACTTCTGACAACGATCGGAGGACCGAAGGAGCTAACCCTTTTTTGCACAACATGGGG  
GATCATGTAACCTGCCTTGATCGTTGGGAACCGGAGCTGAATGAAGCCATACCAAACGAC  
GAGCGTGACACCAGATGCCTGCAGCAATGGCAACAACGTTGCGCAAATTAATACTGGC  
GAACTACTTACTCTAGCTTCCCGGCAACAATTAATAGACTGGATGGAGGCGGATAAAGT  
TGCAGGACCACTTCTGCGCTCGGCCCTTCCGGCTGGCTGGTTTATTGCTGATAAATCTGG  
AGCCGGTGAGCGTGGGTCTCGCGGTATCATTGCAGCACTGGGGCCAGATGGTAAGCCCTC  
CCGTATCGTAGTTATCTACACGACGGGGAGTCAGGCAACTATGGATGAACGAAATAGAC  
AGATCGCTGAGATAGGTGCCTCACTGATTAAGCATTGGTAACCTGTCAGACCAAGTTTACT  
CATATATACTTTAGATTGATTTAAAACCTTCATTTTTTAATTTAAAAGGATCTAGGTGAAG  
ATCCTTTTTGATAATCTCATGACCAAAATCCCTTAACGTGAGTTTTTCGTTCCACTGAGCG  
TCAGACCCCGTAGAAAAGATCAAAGGATCTTCTTGAGATCCTTTTTTTCTGCGCGTAATC  
TGCTGCTTGCAAACAAAAAACACCAGCTACCAGCGGTGGTTTGTGGCCGATCAAGAG  
CTACCAACTCTTTTTCCGAAGGTAACCTGGCTTCCAGCAGAGCGCAGATACCAAATACTGTC  
CTTCTAGTGTAGCCGTAGTTAGGCCACCACTTCAAGAACTCTGTAGCACCGCCTACATAC  
CTCGCTCTGCTAATCCTGTTACCAGTGGCTGCTGCCAGTGGCGATAAGTCGTGTCTTACC  
GGGTTGGACTCAAGACGATAGTTACCGGATAAGGCGCAGCGGTGCGGCTGAACGGGGGG  
TTCGTGCACACAGCCCAGCTTGGAGCGAACGACCTACACCGAACTGAGATACCTACAGCG  
TGAGCTATGAGAAAGCGCCACGCTTCCCGAAGGGAGAAAGGCGGACAGGTATCCGGTAA  
GCGGCAGGGTCCGAACAGGAGAGCGCACGAGGGAGCTTCCAGGGGGAAACGCCTGGTAT  
CTTTATAGTCTGTCGGGTTTTCGCCACCTCTGACTTGAGCGTCGATTTTTTGTGATGCTCG  
TCAGGGGGCGGAGCCTATGGAAAAACGCCAGCAACGCGGCCTTTTTACGGTTCCTGGCC  
TTTTGCTGGCCTTTTGCTCACATGTTCTTTCCTGCGTTATCCCCTGATTCTGTGGATAAC  
CGTATTACCGCCTTTGAGTGAGCTGATACCGCTCGCCGACCCGAACGACCGAGCGCAGC  
GAGTCAGTGAGCGAGGAAGCGGAAGAGCGCCTGATGCGGTATTTTCTCCTTACGCATCTG  
TGCGGTATTTACACCCGCATATGGTGCACCTCAGTACAATCTGCTCTGATGCCGCATAG  
TTAAGCCAGTATACTCCGCTATCGCTACGTGACTGGGTGATGGCTGCGCCCCGACACC  
CGCCAACACCCGCTGACGCGCCCTGACGGGCTTGTCTGCTCCCGGCATCCGCTTACAGACA  
AGCTGTGACCGTCTCCGGGAGCTGCATGTGTGAGAGTTTTTACCCTCATCACCGAAACG  
CGCAGGCAGCTGCGGTAAAGCTCATCAGCGTGGTTCGTGAAGCGATTACAGATGTCTGC  
CTGTTTCATCCCGTCCAGCTCGTTGAGTTTTCTCCAGAAGCGTTAATGTCTGGCTTCTGAT  
AAAGCGGGCCATGTTAAGGGCGTTTTTTCTGTTTTGGTCACTGATGCCTCCGTGTAAGG

GGGATTTCTGTTTCATGGGGGTAATGATACCGATGAAACGAGAGAGGATGCTCACGATAC  
GGGTACTGATGATGAACATGCCCCGTTACTGGAACGTTGTGAGGGTAAACAACCTGGCG  
GTATGGATGCGGCGGACCAGAGAAAAATCACTCAGGGTCAATGCCAGCGCTTCGTAA  
TACAGATGTAGGTGTTCCACAGGGTAGCCAGCAGCATCCTGCGATGCAGATCCGGAACAT  
AATGGTGCAGGGCGCTGACTTCCGCGTTTCCAGACTTTACGAAACACGGAAACCGAAGAC  
CATTCATGTTGTTGCTCAGGTCCGAGACGTTTTGCAGCAGCAGTCGCTTCACGTTGCTC  
GCGTATCGGTGATTCATTCTGCTAACCAGTAAGGCAACCCCGCCAGCCTAGCCGGGTCCT  
CAACGACAGGAGCAGCATCATGCGCACCCGTGGCCAGGACCCAACGCTGCCCCGAAATTCG  
AGCTCACGCGTCATCATCATCAT
