# Supplementary material
Source: PubMed Central journal article supplement (PMC5683167)
Supplement: NIHMS914167-supplement-supp_3.pdf [file NIHMS914167-supplement-supp_3.pdf]

GCCGGCAAGAGCTGAGATGTGGAAGTGGAGTGTTACATACACAATGATGTGGAGGCTTGG  
ATGGACCGGTACAAGTATTACCTGAAACGCCACAAGGCCTAGCCAAGATCATTTCAGAAA  
GCTCATAAGGAAGGAGTGTGCGGTCTACGATCAGTTTCCAGACTGGAGCATCAAATGTG  
GGAAGCAGTGAAGGACGAGCTGAACACTCTTTTGAAGGAGAATGGTGTGGACCTTAGTG  
TCGTGGTTGAGAAACAGGAGGGAATGTACAAGTCAGCACCTAAACGCCTCACCGCCACCA  
CGGAAAAATTGGAATTTGGCTGGAAGGCCTGGGGAAAGAGTATTTTATTTGCACCAGAA  
CTCGCCAACAACACCTTTGTGGTTGATGGTCCGGAGACCAAGGAATGTCCGACTCAGAAT  
CGCGCTTGAATAGCTTAGAAGTGGAGGATTTTGGATTTGGTCTCACCCAGCACTCGGATG  
TTCCTGAAGGTCAGAGAGAGCAACACAACCTGAATGTGACTCGAAGATCATTGGAACGGC  
TGTCAGAACAACCTTGGCGATCCACAGTGACCTGTCTTATTGGATTGAAAGCAGGCTCAA  
TGATACGTGGAAGCTTGAAGGGCAGTCTGGGTGAAGTCAAATCATGTACGTGGCCTG  
AGACGCATACCTTGTGGGGCGATGGAATCCTTGAGAGTGACTTGATAATACCAGTCACAC  
TGGCGGGACCACGAAGCAATCACAATCGGAGACCTGGGTACAAGACACAAAACCAGGGCC  
CATGGGACGAAGGCCGGGTAGAGATTGACTTCGATTACTGCCAGGAACTACGGTCACCC  
TGAGTGAGAGCTGCGGACACCGTGGACCTGCCACTCGCACCACCACAGAGAGCGGAAAGT  
TGATAACAGATTGGTGCTGCAGGAGCTGCACCTACCACCCTGCGCTACCAAACCTGACA  
GCGGCTGTTGGTATGGTATGGAGATCAGACCACAGAGACATGATGAAAAGACCCTCGTG  
CAGTCACAAGTGAATGCTTATAATGCTGATATGATTGACCCTTTTCAGTTGGGCCTTCTG  
GTCGTGTTCTTGGCCACCCAGGAGTCTTTCGCAAGAGGTGGACAGCCAAGATCAGCATG  
CCAGCTATACTGATTGCTCTGCTAGTCCTGGTGTGGGGGCATTACTTACACTGATGTG  
TTACGCTATGTCATCTTGGTGGGGGCAGCTTTCGCAGAATCTAATTCGGGAGGAGACGTG  
GTACACTTGGCGCTCATGGCGACCTTCAAGATACAACCAGTGTTTATGGTGGCATCGTTT  
CTCAAAGCGAGATGGACCAACCAGGAGAACATTTTGTGATGTTGGCGGCTGTTTTCTTT  
CAAATGGCTTATTACGATGCCCGCCAAATTTCTGCTCTGGGAGATCCCTGATGTGTTGAAT  
TCACTGGCGGTAGCTTGGATGATACTGAGAGCCATAACATTCACAACGACATCAAACGTG  
GTTGTTCCGCTGCTAGCCCTGCTAACACCCGGGCTGAGATGCTTGAATCTGGATGTGTAC  
AGGATACTGCTGTTGATGGTCGGAATAGGCAGCTTGATCAGGGAGAAGAGGAGTGCAGC  
TGCAAAAAGAAAGGAGCAAGTCTGCTATGCTTGGCTCTAGCCTCAACAGGACTTTTCA  
ACCCCATGATCCTTGTGCTGGACTGATTGCATGTGATCCCAACCGTAAACGCGGATGGC  
CCGCAACTGAAGTGATGACAGCTGTGCGCCTAATGTTTGCCATCGTCGGAGGGCTGGCAG  
AGCTTGACATTGACTCCATGGCCATTCCAATGACTATCGCGGGGCTCATGTTTGTCTGCTT  
TCGTGATTTCTGGGAAATCAACAGATATGTGGATTGAGAGAACGGCGGACATTTCTGG  
GAAAGTGATGCAGAAATTACAGGCTCGAGCGAAAGAGTTGATGTGCGGCTTGATGATGA  
TGAAACTTCCAGCTCATGAATGATCCAGGAGCACCTTGAAGATATGGATGCTCAGAA  
TGGTCTGTCTCGGATTAGTGCGTACACCCCTGGGCAATCTTGCCCTCAGTAGTTGGAT  
TTTGGATAACTCTCCAATACACAAAGAGAGGAGGCGTGTTGTGGGACACTCCCTCACCAA  
AGGAGTACAAAAGGGGGACACGACCACCGGCTCTACAGGATCATGACTCGTGGGCTGC  
TCGGCAGTTATCAAGCAGGAGCGGGCGTGATGGTTGAAGGTGTTTTCCACACCCTTTGGC  
ATACAACAAAAGGAGCCGCTTTGATGAGCGGAGAGGGCCGCTGGACCCATACTGGGGCA  
GTGTCAAGGAGGATCGACTTTGTTACGGAGGACCCTGGAAATTGCAGCACAAGTGAAC  
GGGCAGGATGAGGTGCAGATGATTGTGGTGAACCTGGCAGGAACGTTAAGAACGTCCA  
GACGAAACCAGGGGTGTTCAAAACACCTGAAGGAGAAATCGGGGCCGTGACTTTGGACT  
TCCCCACTGGAACATCAGGCTCACCAATAGTGGACAAAACGGTGTGATGTGATTGGGCTTT  
ATGGCAATGGAGTCATAATGCCCAACGGCTCATACATAAGCGCGATAGTGCAGGGTGAA  
AGGATGGATGAGCCAATCCAGCCGATTCGAACCTGAGATGCTGAGGAAAAACAGAT  
CACTGTACTGGATCTCCATCCCGGCCCGGTAACAAGGAGGATTCTGCCACAGATCAT

CAAAGAGGCCATAAACAGAAGACTGAGAACAGCCGTGCTAGCACCAACCAGGGTTGTGG  
CTGCTGAGATGGCTGAAGCACTGAGAGGACTGCCCATCCGGTACCAGACATCCGCAGTGC  
CCAGAGAACATAATGGAAATGAGATTGTTGATGTCATGTGTCATGCTACCCTCACCCACA  
GGCTGATGTCTCCTCACAGGGTGCCGAAC TACAACCTGTTCTGATGGATGAGGCTCATT  
TCACCGACCCAGCTAGCATTGCAGCAAGAGGTTACATTTCCACAAAGGTCGAGCTAGGGG  
AGGCGGCGGCAATATTCATGACAGCCACCCACCAGGCACTTCAGATCCATTCCCAGAGT  
CCAATTCACCAATTTCCGACTTACAGACTGAGATCCCGGATCGAGCTTGGAACCTGGAT  
ACGAATGGATCACAGAATACACCGGGAAGACGGTTTTGGTTTTGTGCCTAGTGTCAAGATG  
GGGAATGAGATTGCCCTTTGCCTACAACGTGCTGGAAAGAAAGTAGTCCAATTGAACAG  
AAAGTCGTACGAGACGGAGTACCCAAAATGTAAGAACGATGATTGGGACTTTGTTATCA  
CAACAGACATATCTGAAATGGGGGCTAACTTCAAGGCGAGCAGGGTGATTGACAGCCGG  
AAGAGTGTGAAACCAACCATCATAACAGAAGGAGAAGGGAGAGTGATCCTGGGAGAACC  
ATCTGCAGTGACAGCAGCTAGTGCCGCCAGAGACGTGGACGTATCGGTAGAAATCCGTC  
GCAAGTTGGTGATGAGTACTGTTATGGGGGACACGAATGAAGACGACTCGAACTTCG  
CCCATTGGACTGAGGCACGAATCATGCTGGACAACATCAACATGCCAAACGGACTGATCG  
CTCAATTCTACCAACCAGAGCGTGAGAAGGTATATACCATGGATGGGGAATACCGGCTCA  
GAGGAGAAGAGAGAAAAAACTTTCTGGAAGTGTGAGGACTGCAGATCTGCCAGTTTGG  
CTGGCTTACAAGGTTGCAGCGGCTGGAGTGTACATACCACGACCGGAGGTGGTGCTTTGAT  
GGTCTAGGACAAACACAATTTTAGAAGACAACAACGAAGTGGAAGTCATCACGAAGCT  
TGGTGAAAGGAAGATTCTGAGGCCGCGCTGGATTGACGCCAGGGTGTACTCGGATCACCA  
GGCACTAAAGGCGTTCAAGGACTTCGCCTCGGGAAAACGTTCTCAGATAGGGCTCATTGA  
GGTCTGGGAAAGATGCCTGAGCACTTCATGGGGAAGACATGGGAAGCACTTGACACCA  
TGTACGTTGTGGCCACTGCAGAGAAAGGAGGAAGAGCTCACAGAATGGCCCTGGAGGAA  
CTGCCAGATGCTCTTCAGACAATTGCCTTGATTGCCTTATTGAGTGTGATGACCATGGGA  
GTATTCTTCCTCCTCATGCAGCGGAAGGGCATTGGAAGATAGGTTTGGGAGGCGCTGTC  
TTGGGAGTCGCGACCTTTTTCTGTTGGATGGCTGAAGTTCAGGAACGAAGATCGCCGGA  
ATGTTGCTGCTCTCCCTTCTTTGATGATTGTGCTAATTCCTGAGCCAGAGAAGCAACGT  
TCGCAGACAGACAACCAGCTAGCCGTGTTCCCTGATTTGTGTCATGACCCTTGTGAGCGCA  
GTGGCAGCCAACGAGATGGGTTGGCTAGATAAGACCAAGAGTGACATAAGCAGTTTGT  
TGGGCAAAGAATTGAGGTCAAGGAGAATTTGAGCATGGGAGAGTTTCTTTTGGACTTGA  
GGCCTGCAACAGCCTGGTCACTGTACGCTGTGACAACAGCGGTCCTCACTCCACTGCTAA  
AGCATTGATCACGTCAGATTACATCAACACCTCATTGACCTCAATAAACGTTGAGGCAA  
GTGCACTATTCACACTCGCGCGAGGCTTCCCCTTCGTCGATGTTGGAGTGTGCGCTCTCC  
TGCTAGCAGCCGGATGCTGGGGACAAGTCACCCTCACCGTTACGGTAACAGCGGCAACAC  
TCCTTTTTTGGCACTATGCCTACATGGTTCCCGGTTGGCAAGCTGAGGCAATGCGCTCAG  
CCCAGCGGCGGACAGCGGCCGGAATCATGAAGAACGCTGTAGTGGATGGCATCGTGGCCA  
CGGACGTCCCAGAATTAGAGCGCACCCACACCCATCATGCAGAAGAAAGTTGGACAGATCA  
TGCTGATCTTGGTGTCTCTAGCTGCAGTAGTAGTGAACCCGTCTGTGAAGACAGTACGAG  
AAGCCGGAATTTTGATCACGGCCGAGCGGTGACGCTTTGGGAGAATGGAGCAAGCTCTG  
TTTGGAAACGCAACAACTGCCATCGGACTCTGCCACATCATGCGTGGGGGTTGGTTGTCAT  
GTCTATCCATAACATGGACACTCATAAAGAACATGGAAAAACCAGGACTAAAAAGAGGT  
GGGGCAAAGGACGCACCTTGGGAGAGGTTTGGAAAGAAAGACTCAACCAGATGACAAA  
AGAAGAGTTCACTAGGTACCGCAAAGAGGCCATCATCGAAGTCGATCGCTCAGCGGCAA  
AACACGCCAGGAAAGAAGGCAATGTCCTGGAGGGCATCCAGTCTCTAGGGGCACAGCA  
AAACTGAGATGGCTGGTTCGAACGGAGGTTTCTCGAACCGGTCGGAAAAGTGATTGACCT  
TGGATGTGGAAGAGCGGTTGGTGTACTATATGGCAACCCAAAAAAGAGTCCAAGAAG

TCAGAGGGTACACAAAGGGCGGTCCCGGACATGAAGAGCCCCAACTAGTGCAAAGTTAT  
GGATGGAACATTGTACCCATGAAGAGTGGAGTGGATGTGTTCTACAGACCTTCTGAGTG  
TTGTGACACCCTCCTTTGTGACATCGGAGAGTCTCGTCAAGTGCTGAGGTTGAAGAGCA  
TAGGACGATTCCGGTCTTGAAATGGTTGAGGACTGGCTGCACCGAGGGCCAAGGGAAT  
TTTGGGTGAAGGTGCTCTGCCCTACATGCCGAAAGTCATAGAGAAGATGGAGCTGCTCC  
AACGCCGTATGGGGGGGACTGGTCAGAAACCCACTCTCACGGAATTCACGCACGAGA  
TGTATTGGGTGAGTCGAGCTTCAGGCAATGTGGTACATTCAGTGAATATGACCAGCCAG  
GTGCTCCTAGGAAGAATGGAAAAAGGACCTGGAAGGGACCCCAATACGAGGAAGATGT  
AACTTGGGAAGTGGAACCAGGGCGGTGGGAAAACCCCTGCTCAACTCAGACACCAGTA  
AAATCAAGAACAGGATTGAACGACTCAGGCGTGAGTACAGTTCGACGTGGCACCACGAT  
GAGAACCACCCATATAGAACCTGGAACCTATCACGGCAGTTATGATGTGAAGCCCACAGGC  
TCCGCCAGTTCGCTGGTCAATGGAGTGGTCAGGCTCCTCTCAAACCATGGGACACCATC  
ACGAATGTTACCACCATGGCCATGACTGACACTACTCCCTTCGGGCAGCAGCGAGTGTTT  
AAAGAGAAGGTGGACACGAAAGCTCCTGAACCGCCAGAAGGAGTGAAGTACGTGCTCAA  
CGAGACCACCAACTGGTTGTGGGCGTTTTTGGCCAGAGAAAAACGTCCAGAAATGTGCTC  
TCGAGAGGAATTCATAAGAAAGGTCAACAGCAATGCAGCTTTGGGTGCCATGTTTGAAG  
AGCAGAATCAATGGAGGAGCGCCAGAGAAGCAGTTGAAGATCCAAAATTTTGGGAGATG  
GTGGATGAGGAGCGGAGGCACATCTGCGGGGGAATGTCACACTTGCATTTACAACAT  
GATGGGAAAGAGAGAGAAAAAACCCGGAGAGTTCGGAAAGGCCAAGGGAAGCAGAGCCA  
TTTGGTTCATGTGGCTCGGAGCTCGCTTTCTGGAGTTCGAGGCTCTGGGTTTTCTCAATG  
AAGACCACTGGCTTGGAAAGAAAGAACTCAGGAGGAGGTGTCGAGGGCTTGGGCCTCAA  
AACTGGGTACATCCTGCGTGAAGTTGGCACCCGGCCTGGGGCAAGATCTATGCTGAT  
GACACAGCTGGCTGGGACACCCGCATCACGAGAGCTGACTTGGAAAATGAAGCTAAGGT  
GCTTGAGCTGCTTGATGGGGAACATCGGCGTCTTGCCAGGGCCATCATTGAGCTCACCTA  
TCGTCACAAAGTTGTGAAAGTGATGCGCCCGCTGCTGATGGAAGAACCGTCATGGATG  
TTATCTCCAGAGAAGATCAGAGGGGGAGTGGACAAGTTGTCACCTACGCCCTAAACACTT  
TCACCAACCTGGCCGTCCAGCTGGTGAGGATGATGGAAGGGGAAGGAGTGATTGGCCCA  
GATGATGTGGAGAACTCACAAAAGGGAAGGACCCAAAGTCAGGACCTGGCTGTTTGA  
GAATGGGGAAGAAAGACTCAGCCGCATGGCTGTCAGTGGAGATGACTGTGTGGTAAAGC  
CCCTGGACGATCGCTTTGCCACCTCGCTCCACTTCTCAATGCTATGTCAAAGGTTTCGCA  
AAGACATCCAAGAGTGGAACCGTCAACTGGATGGTATGATTGGCAGCAGGTTCCATTT  
TGCTCAAACCATTTCACTGAATTGATCATGAAAGATGGAAGAACACTGGTGGTTCCATG  
CCGAGGACAGGATGAATTGGTAGGCAGAGCTCGCATATCTCCAGGGCCGGATGGAACG  
TCCGCGACACTGCTTGTCTGGCTAAGTCTTATGCCCAGATGTGGCTGCTTCTGTACTTCC  
ACAGAAGAGACCTGCGGCTCATGGCCAACGCCATTTGCTCCGCTGTCCCTGTGAATTGGG  
TCCCTACCGGAAGAACCACGTGGTCCATCCATGCAGGAGGAGAGTGGATGACAACAGAG  
GACATGTTGGAGGTCTGGAACCGTGTGGATAGAGGAGAATGAATGGATGGAAGACAA  
AACCCAGTGGAGAAATGGAGTGACGTCCCATATTCAGGAAAACGAGAGGACATCTGGT  
GTGGCAGCCTGATTGGCACAAGAGCCGAGCCACGTGGGCAGAAAACATCCAGGTGGCTA  
TCAACCAAGTCAGAGCAATCATCGGAGATGAGAAGTATGTGGATTACATGAGTTCACTA  
AAGAGATATGAAGACACAACCTTTGGTTGAGGACACAGTACTGTAGATATTTAATCAATT  
GTAAATAGACAATATAAGTATGCATCTTGGCATTACCCGCGTGCCTTACTTGGCATTAC  
CGCGTGCCTTATAGGAGAGAGAAAAAGACTGATAGGAGAGAGAAAAAGACTGAAAAAGT  
GTAGTTTTATAGTAGTATTTAGTGGTGTAGTGTAATAGTTAAGAAAATTTTGGAGGAG  
AAAGTCAGGCCGGGAAGTTCCCGCCACCGGAAGTTGAGTAGACGGTGCTGCCTGCGACTC  
AACCCAGGAGGACTGGGTGAACAAAGCCGGAAGTGATCCATGTAAGCCCTCAGAACCG

TCTCGGAAGGAGGACCCCACATGTTGTAACCTCAATAGGAGAGAGAAAAAGACTGATAG  
GAGAGAGAAAAAGACTGACTTGGCATTACACCGCGTGCCTTACTTGGCATTACACCGCGTGC  
CTTAAGCCCAATGTCAGACCACGCTACGGCGTGCTACTCTGCGGAGAGTGCAGTCTGCGA  
TAGTGCCCCAGGAGGACTGGGTAAACAAAGGCAAACCAACGCCCCACGCGGCCCTAGCCC  
CGGTAATGGTGTAAACCAGGGCGAAAGGACTAGAGGTTAGAGGAGACCCCGCGGTTTAA  
AGTGCACGGCCAGCCTGGCTGAAGCTGTAGGTCAGGGGAAGGACTAGAGGTTAGTGA  
GACCCCGTGCCACAAAACACCACAACAAAACAGCATATTGACACCTGGGATAGACTAGGA  
GATCTTCTGCTCTGCACAACCAGCCACACGGCACAGTGCGCCGACAATGGTGGCTGGTGG  
TGCGAGAACACAGGATCTCTAGAGTCGAATTGAAAAAGGAAGAGTATGAGTATTCAACA  
TTTCCGTGTCGCCCTTATTCCCTTTTTTGGCGCATTTTGCCTTCCTGTTTTTGTCAACCA  
GAAACGCTGGTGAAGTAAAAGATGCTGAAGATCAGTTGGGTGCACGAGTGGGTTACAT  
CGAACTGGATCTCAACAGCGGTAAGATCCTTGAGAGTTTTCGCCCCGAAGAAGTTTTCC  
AATGATGAGCACTTTTAAAGTTCTGCTATGTGGCGCGGTATTATCCCGTGTTGACGCCGG  
GCAAGAGCAACTCGGTGCGCCGATACACTATTCTCAGAATGACTTGGTTGAGTACTCACC  
AGTCACAGAAAAGCATCTTACGGATGGCATGACAGTAAGAGAATTATGCAGTGTGCCA  
TAACCATGAGTGATAAACAAGTGGCCAACTTACTTCTGACAACGATCGGAGGACCGAAGG  
AGCTAACCGTTTTTTTGCACAACATGGGGGATCATGTAACCTCGCCTTGATCGTTGGGAAC  
CGGAGCTGAATGAAGCCATACCAAACGACGAGCGTGACACCACGATGCCTGCAGCAATGG  
CAACAACGTTGCGCAAACATTAACCTGGCGAACTACTTACTCTAGCTTCCCGGCAACAAT  
TAATAGACTGGATGGAGGCGGATAAAGTTGCAGGACCACTTCTGCGCTCGGCCCTTCCGG  
CTGGCTGGTTTATTGCTGATAAATCTGGAGCCGGTGAGCGTGGGTCTCGCGGTATCATTG  
CAGCACTGGGGCCAGATGGTAAGCCCTCCCGTATCGTAGTTATCTACACGACGGGGAGTC  
AGGCAACTATGGATGAACGAAATAGACAGATCGCTGAGATAGGTGCCTCACTGATTAAG  
CATTGGTAACTGTCAGACCAAGTTTACTCATATATACTTTAGATTGATTTAAAACCTTCAT  
TTTTAATTTAAAAGGATCTAGGTGAAGATCCTTTTTTGATAATCTCATGACCAAAAATCCC  
TTAACGTGAGTTTTTCGTTCCACTGAGCGTCAGACCCCGTAGAAAAGATCAAAGGATCTTC  
TTGAGATCCTTTTTTTCTGCGCGTAATCTGCTGCTTGCAAACAAAAAAACCACCGTACC  
AGCGGTGGTTTTGTTTGGCGGATCAAGAGCTACCAACTCTTTTTTCCGAAGGTAACCTGGCTT  
CAGCAGAGCGCAGATACCAAATACTGTCCTTCTAGTGTAGCCGTAGTTAGGCCACCACTT  
CAAGAACTCTGTAGCACCGCCTACATACCTCGCTCTGCTAATCCTGTTACCAGTGGCTGC  
TGCCAGTGGCGATAAGTCGTGTCTTACCGGGTTGGAAGTCAAGACGATAGTTACCGGATAA  
GGCGCAGCGGTGCGGCTGAACGGGGGGTTCGTGCACACAGCCAGCTTGGAGCGAACGAC  
CTACACCGAACTGAGATACCTACAGCGTGAGCTATGAGAAAGCGCCACGCTTCCCAGAGG  
GAGAAAGGCGGACAGGTATCCGTAAGCGGCAGGGTCCGAACAGGAGAGCGCACGAGGG  
AGCTTCCAGGGGAAACGCCTGGTATCTTTATAGTCCTGTGCGGTTTTCGCCACCTCTGAC  
TTGAGCGTCGATTTTTGTGATGCTCGTCAGGGGGGCGGAGCCTATGGAAAAACGCCAGCA  
ACGCGGCCCTTTTTACGGTTCCTGGCCTTTTGCTGGCCTTTTGCTCACATGTTCTTTCTGCTG  
GTTATCCCCTGATTCTGTGGATAACCGTATTACCGCCTTTGAGTGAGCTGATACCGCTCG  
CCGAGCCGAACGACCGAGCGCAGCGAGTCAGTGAGCGAGGAAGCGGAAGAGCGCCTGAT  
GCGGTATTTTCTCCTTACGCATCTGTGCGGTATTTACACCGCATATGGTGCACCTCTCAG  
TACAATCTGCTCTGATGCCGCATAGTTAAGCCAGTATACTACTCCGCTATCGCTACGTGAC  
TGGGTGATGGCTGCGCCCCGACACCCGCCAACACCCGCTGACGCGCCCTGACGGGCTTGT  
TGCTCCCGGCATCCGCTTACAGACAAGCTGTGACCGTCTCCGGGAGCTGCATGTGTCAGA  
GGTTTTTACCGTTCATACCGAAACGCGCGAGGCAGCTGCGGTAAAGCTCATCAGCGTGGT  
CGTGAAGCGATTCACAGATGTCTGCCTGTTTCATCCGCGTCCAGCTCGTTGAGTTTCTCCA  
GAAGCGTTAATGTCTGGCTTCTGATAAAGCGGGCCATGTTAAGGGCGGTTTTTCTCCTGTT

TGGTCACTGATGCCTCCGTGTAAGGGGGATTTCTGTTTCATGGGGGTAATGATACCGATGA  
AACGAGAGAGGATGCTCACGATACGGGTACTGATGATGAACATGCCCGGTTACTGGAA  
CGTTGTGAGGGTAAACAACCTGGCGGTATGGATGCGGCGGGACCAGAGAAAAATCACTCA  
GGGTCAATGCCAGCGCTTCGTTAATACAGATGTAGGTGTTCCACAGGGTAGCCAGCAGCA  
TCCTGCGATGCAGATCCGGAACATAATGGTGCAGGGCGCTGACTTCCGCGTTTCCAGACT  
TTACGAAACACGGAAACCGAAGACCATTTCATGTTGTTGCTCAGGTTCGACAGCGTTTTGCA  
GCAGCAGTCGCTTCACGTTTCGCTCGCGTATCGGTGATTTCATTCTGCTAACCAGTAAGGCA  
ACCCCGCCAGCCTAGCCGGGTCCTCAACGACAGGAGCACGATCATGCGCACCCCGTGGCCA  
GGACCAACGCTGCCCGAAATTTCGAGCTCACGCGTCATCATCATCAT
