# Supplementary material
Source: PubMed Central journal article supplement (PMC5683167)
Supplement: NIHMS914167-supplement-supp_4.pdf [file NIHMS914167-supplement-supp_4.pdf]

GCCGGCAAGAGCTGAGATGTGGAAGTGGAGTGTTACATACACAATGATGTGGAGGCTTGG  
ATGGACCGGTACAAGTATTACCTGAAACGCCACAAGGCCTAGCCAAGATCATTTCAGAAA  
GCTCATAAGGAAGGAGTGTGCGGTCTACGATCAGTTTCCAGACTGGAGCATCAAATGTG  
GGAAGCAGTGAAGGACGAGCTGAACACTCTTTTGAAGGAGAATGGTGTGGACCTTAGTG  
TCGTGGTTGAGAAACAGGAGGGAATGTACAAGTCAGCACCTAAACGCCTCACCGCCACCA  
CGGAAAAATTGGAATTTGGCTGGAAGGCCTGGGGAAAGAGTATTTTATTTGCACCAGAA  
CTCGCCAACAACACCTTTGTGGTTGATGGTCCGGAGACCAAGGAATGTCCGACTCAGAAT  
CGCGCTTGAATAGCTTAGAAGTGGAGGATTTTGGATTTGGTCTCACCCAGCACTCGGATG  
TTCCTGAAGGTCAGAGAGAGCAACACAACCTGAATGTGACTCGAAGATCATTGGAACGGC  
TGTCAGAACAACCTTGGCGATCCACAGTGACCTGTCTTATTGGATTGAAAGCAGGCTCAA  
TGATACGTGGAAGCTTGAAGGGCAGTCTGGGTGAAGTCAAATCATGTACGTGGCCTG  
AGACGCATACCTTGTGGGGCGATGGAATCCTTGAGAGTGACTTGATAATACCAGTCACAC  
TGGCGGGACCACGAAGCAATCACAATCGGAGACCTGGGTACAAGACACAAAACCAGGGCC  
CATGGGACGAAGGCCGGGTAGAGATTGACTTCGATTACTGCCAGGAACTACGGTCACCC  
TGAGTGAGAGCTGCGGACACCGTGGACCTGCCACTCGCACCACCACAGAGAGCGGAAAGT  
TGATAACAGATTGGTGTGCTGCAGGAGCTGCACCTTACCACCACTGCGCTACCAAACCTGACA  
GCGGCTGTTGGTATGGTATGGAGATCAGACCACAGAGACATGATGAAAAGACCCTCGTG  
CAGTCACAAGTGAATGCTTATAATGCTGATATGATTGACCCTTTTTCAGTTGGGCCTTCTG  
GTCGTGTTCTTGGCCACCCAGGAGTCTTTCGCAAGAGGTGGACAGCCAAGATCAGCATG  
CCAGCTATACTGATTGCTCTGCTAGTCCTGGTGTGTTGGGGGCATTACTTACACTGATGTG  
TTACGCTATGTCATCTTGGTGGGGGCAGCTTTCGCAGAATCTAATTCGGGAGGAGACGTG  
GTACACTTGGCGCTCATGGCGACCTTCAAGATACAACCAGTGTTTATGGTGGCATCGTTT  
CTCAAAGCGAGATGGACCAACCAGGAGAACATTTTGTGATGTTGGCGGCTGTTTTCTTT  
CAAATGGCTTATTACGATGCCCGCCAAATTTCTGCTCTGGGAGATCCCTGATGTGTTGAAT  
TCACTGGCGGTAGCTTGGATGATACTGAGAGCCATAACATTCACAACGACATCAAACGTG  
GTTGTTCCGCTGCTAGCCCTGCTAACACCCGGGCTGAGATGCTTGAATCTGGATGTGTAC  
AGGATACTGCTGTTGATGGTTCGGAATAGGCAGCTTGCATCAGGGAGAAGAGGAGTGCAGC  
TGCAAAAAGAAAGGAGCAAGTCTGCTATGCTTGGCTCTAGCCTCAACAGGACTTTTCA  
ACCCCATGATCCTTGTGCTGGACTGATTGCATGTGATCCCAACCGTAAACGCGGATGGC  
CCGCAACTGAAGTGATGACAGCTGTGCGCCTAATGTTTGGCATCGTCGGAGGGCTGGCAG  
AGCTTGACATTGACTCCATGGCCATTCCAATGACTATCGCGGGGCTCATGTTTGTGCTGCTT  
TCGTGATTTCTGGGAAATCAACAGATATGTGGATTGAGAGAACGGCGGACATTTCTGG  
GAAAGTGATGCAGAAATTACAGGCTCGAGCGAAAGAGTTGATGTGCGGCTTGATGATGA  
TGAAACTTCCAGCTCATGAATGATCCAGGAGCACCTTGAAGATATGGATGCTCAGAA  
TGGTCTGTCTCGGATTAGTTCGTACACCCCTGGGCAATCTTGCCCTCAGTAGTTGGAT  
TTTGGATAACTCTCCAATACACAAAGAGAGGAGGCGTGTGTTGGGACACTCCCTCACCAA  
AGGAGTACAAAAGGGGGACACGACCACCGGCTCTACAGGATCATGACTCGTGGGCTGC  
TCGGCAGTTATCAAGCAGGAGCGGGCGTGATGGTTGAAGGTGTTTTCCACACCCTTTGGC  
ATACAACAAAAGGAGCCGCTTTGATGAGCGGAGAGGGCCGCTGGACCCATACTGGGGCA  
GTGTCAAGGAGGATCGACTTTGTTACGGAGGACCCTGGAAATTGCAGCACAAGTGAAC  
GGGCAGGATGAGGTGCAGATGATTGTGGTGAACCTGGCAGGAACGTTAAGAACGTCCA  
GACGAAACCAGGGGTGTTCAAAACACCTGAAGGAGAAATCGGGGCCGTGACTTTGGACT  
TCCCCACTGGAACATCAGGCTCACCAATAGTGGACAAAAACGGTGTGATGTGATTGGGCTTT  
ATGGCAATGGAGTCATAATGCCAACGGCTCATACATAAGCGCGATAGTGCAGGGTGAA  
AGGATGGATGAGCCAATCCAGCCGATTCGAACCTGAGATGCTGAGGAAAAAACAGAT  
CACTGTACTGGATCTCCATCCCGGCCCGGTAACAAGGAGGATTCTGCCACAGATCAT

CAAAGAGGCCATAAACAGAAGACTGAGAACAGCCGTGCTAGCACCAACCAGGGTTGTGG  
CTGCTGAGATGGCTGAAGCACTGAGAGGACTGCCCATCCGGTACCAGACATCCGCAGTGC  
CCAGAGAACATAATGGAAATGAGATTGTTGATGTCATGTGTCATGCTACCCTCACCCACA  
GGCTGATGTCTCCTCACAGGGTGCCGAAC TACAACCTGTTCTGATGGATGAGGCTCATT  
TCACCGACCCAGCTAGCATTGCAGCAAGAGGTTACATTTCCACAAAGGTCGAGCTAGGGG  
AGGCGGCGGCAATATTCATGACAGCCACCCACCAGGCACTTCAGATCCATTCCCAGAGT  
CCAATTCACCAATTTCCGACTTACAGACTGAGATCCCGGATCGAGCTTGGAACCTGGAT  
ACGAATGGATCACAGAATACACCGGGAAGACGGTTTTGGTTTTGTGCCTAGTGTCAAGATG  
GGGAATGAGATTGCCCTTTGCCTACAACGTGCTGGAAAGAAAGTAGTCCAATTGAACAG  
AAAGTCGTACGAGACGGAGTACCCAAAATGTAAGAACGATGATTGGGACTTTGTTATCA  
CAACAGACATATCTGAAATGGGGGCTAACTTCAAGGCGAGCAGGGTGATTGACAGCCGG  
AAGAGTGTGAAACCAACCATCATAACAGAAGGAGAAGGGAGAGTGATCCTGGGAGAACC  
ATCTGCAGTGACAGCAGCTAGTGCCGCCAGAGACGTGGACGTATCGGTAGAAATCCGTC  
GCAAGTTGGTGATGAGTACTGTTATGGGGGACACGAATGAAGACGACTCGAACTTCG  
CCCATTGGACTGAGGCACGAATCATGCTGGACAACATCAACATGCCAAACGGACTGATCG  
CTCAATTCTACCAACCAGAGCGTGAGAAGGTATATACCATGGATGGGGAATACCGGCTCA  
GAGGAGAAGAGAGAAAAAACTTTCTGGAAGTGTGAGGACTGCAGATCTGCCAGTTTGG  
CTGGCTTACAAGGTTGCAGCGGCTGGAGTGTACATACCACGACCGGAGGTGGTGCTTTGAT  
GGTCTAGGACAAACACAATTTTAGAAGACAACAACGAAGTGGAAGTCATCACGAAGCT  
TGGTGAAAGGAAGATTCTGAGGCCGCGCTGGATTGACGCCAGGGTGTACTCGGATCACCA  
GGCACTAAAGGCGTTCAAGGACTTCGCCTCGGGAAAACGTTCTCAGATAGGGCTCATTGA  
GGTCTGGGAAAGATGCCTGAGCACTTCATGGGGAAGACATGGGAAGCACTTGACACCA  
TGTACGTTGTGGCCACTGCAGAGAAAGGAGGAAGAGCTCACAGAATGGCCCTGGAGGAA  
CTGCCAGATGCTCTCAGACAATTGCCTTGATTGCCTTATTGAGTGTGATGACCATGGGA  
GTATTCTTCCTCCTCATGCAGCGGAAGGGCATTGGAAGATAGGTTTGGGAGGCGCTGTC  
TTGGGAGTCGCGACCTTTTTCTGTTGGATGGCTGAAGTTCAGGAACGAAGATCGCCGGA  
ATGTTGCTGCTCTCCCTTCTTTGATGATTGTGCTAATTCCTGAGCCAGAGAAGCAACGT  
TCGCAGACAGACAACCAGCTAGCCGTGTTCCCTGATTTGTGTCATGACCCTTGTGAGCGCA  
GTGGCAGCCAACGAGATGGGTTGGCTAGATAAGACCAAGAGTGACATAAGCAGTTTGT  
TGGGCAAAGAATTGAGGTCAAGGAGAATTTAGCATGGGAGAGTTTCTTTTGGACTTGA  
GGCCTGCAACAGCCTGGTCACTGTACGCTGTGACAACAGCGGTCCTCACTCCACTGCTAA  
AGCATTGATCACGTCAGATTACATCAACACCTCATTGACCTCAATAAACGTTCAAGCAA  
GTGCACTATTCACACTCGCGCGAGGCTTCCCCTTCGTCGATGTTGGAGTGTGCGCTCTCC  
TGCTAGCAGCCGGATGCTGGGGACAAGTCACCCTCACCGTTACGGTAACAGCGGCAACAC  
TCCTTTTTTGGCACTATGCCTACATGGTTCCCGGTTGGCAAGCTGAGGCAATGCGCTCAG  
CCCAGCGGCGGACAGCGGCCGGAATCATGAAGAACGCTGTAGTGGATGGCATCGTGGCCA  
CGGACGTCCCAGAATTAGAGCGCACCCACCCATCATGCAGAAGAAAGTTGGACAGATCA  
TGCTGATCTTGGTGTCTCTAGCTGCAGTAGTAGTGAACCCGTCTGTGAAGACAGTACGAG  
AAGCCGGAATTTTGATCACGGCCGAGCGGTGACGCTTTGGGAGAATGGAGCAAGCTCTG  
TTTGGAAACGCAACAACCTGCCATCGGACTCTGCCACATCATGCGTGGGGGTTGGTTGTCAT  
GTCTATCCATAACATGGACACTCATAAAGAACATGGAAAAACCAGGACTAAAAAGAGGT  
GGGGCAAAGGACGCACCTTGGGAGAGGTTTGGAAAGAAAGACTCAACCAGATGACAAA  
AGAAGAGTTCACTAGGTACCGCAAAGAGGCCATCATCGAAGTCGATCGCTCAGCGGCAA  
AACACGCCAGGAAAGAAGGCAATGTCCTGGAGGGCATCCAGTCTCTAGGGGCACAGCA  
AAACTGAGATGGCTGGTTCGAACGGAGGTTTCTCGAACCGGTCGGAAAAGTGATTGACCT  
TGGATGTGGAAGAGCGGTTGGTGTACTATATGGCAACCCAAAAAAGAGTCCAAGAAG

TCAGAGGGTACACAAAGGGCGGTCCCGGACATGAAGAGCCCCAACTAGTGCAAAGTTAT  
GGATGGAACATTGTACCCATGAAGAGTGGAGTGGATGTGTTCTACAGACCTTCTGAGTG  
TTGTGACACCCTCCTTTGTGACATCGGAGAGTCTCGTCAAGTGCTGAGGTTGAAGAGCA  
TAGGACGATTCCGGTCTTGAAATGGTTGAGGACTGGCTGCACCGAGGGCCAAGGGAAT  
TTTGGGTGAAGGTGCTCTGCCCTACATGCCGAAAGTCATAGAGAAGATGGAGCTGCTCC  
AACGCCGTATGGGGGGGACTGGTCAGAAACCCACTCTCACGGAATTCACGCACGAGA  
TGTATTGGGTGAGTCGAGCTTCAGGCAATGTGGTACATTCAGTGAATATGACCAGCCAG  
GTGCTCCTAGGAAGAATGGAAAAAGGACCTGGAAGGGACCCCAATACGAGGAAGATGT  
AACTTGGGAAGTGGAACCAGGGCGGTGGGAAAACCCCTGCTCAACTCAGACACCAGTA  
AAATCAAGAACAGGATTGAACGACTCAGGCGTGAGTACAGTTCGACGTGGCACCACGAT  
GAGAACCACCCATATAGAACCTGGAACCTATCACGGCAGTTATGATGTGAAGCCCACAGGC  
TCCGCCAGTTCGCTGGTCAATGGAGTGGTCAGGCTCCTCTCAAACCATGGGACACCATC  
ACGAATGTTACCACCATGGCCATGACTGACACTACTCCCTTCGGGCAGCAGCGAGTGTTT  
AAAGAGAAGGTGGACACGAAAGCTCCTGAACCGCCAGAAGGAGTGAAGTACGTGCTCAA  
CGAGACCACCAACTGGTTGTGGGCGTTTTTGGCCAGAGAAAAACGTCCAGAAATGTGCTC  
TCGAGAGGAATTCATAAGAAAGGTCAACAGCAATGCAGCTTTGGGTGCCATGTTTGAAG  
AGCAGAATCAATGGAGGAGCGCCAGAGAAGCAGTTGAAGATCCAAAATTTTGGGAGATG  
GTGGATGAGGAGCGGAGGCACATCTGCGGGGGAATGTCACACTTGCATTTACAACAT  
GATGGGAAAGAGAGAGAAAAAACCCGGAGAGTTCGGAAAGGCCAAGGGAAGCAGAGCCA  
TTTGGTTCATGTGGCTCGGAGCTCGCTTTCTGGAGTTCGAGGCTCTGGGTTTTCTCAATG  
AAGACCACTGGCTTGGAAAGAAAGAACTCAGGAGGAGGTGTCGAGGGCTTGGGCCTCAA  
AACTGGGTACATCCTGCGTGAAGTTGGCACCCGGCCTGGGGCAAGATCTATGCTGAT  
GACACAGCTGGCTGGGACACCCGCATCACGAGAGCTGACTTGGAAAATGAAGCTAAGGT  
GCTTGAGCTGCTTGATGGGGAACATCGGCGTCTTGCCAGGGCCATCATTGAGCTCACCTA  
TCGTCACAAAGTTGTGAAAGTGATGCGCCCGCTGCTGATGGAAGAACCGTCATGGATG  
TTATCTCCAGAGAAGATCAGAGGGGGAGTGGACAAGTTGTCACCTACGCCCTAAACACTT  
TCACCAACCTGGCCGTCCAGCTGGTGAGGATGATGGAAGGGGAAGGAGTGATTGGCCCA  
GATGATGTGGAGAACTCACAAAAGGGAAGGACCCAAAGTCAGGACCTGGCTGTTTGA  
GAATGGGGAAGAAAGACTCAGCCGCATGGCTGTCAGTGGAGATGACTGTGTGGTAAAGC  
CCCTGGACGATCGCTTTGCCACCTCGCTCCACTTCTCAATGCTATGTCAAAGGTTTCGCA  
AAGACATCCAAGAGTGGAACCGTCAACTGGATGGTATGATTGGCAGCAGGTTCCATTT  
TGCTCAAACCATTTCACTGAATTGATCATGAAAGATGGAAGAACACTGGTGGTTCCATG  
CCGAGGACAGGATGAATTGGTAGGCAGAGCTCGCATATCTCCAGGGCCGGATGGAACG  
TCCGCGACACTGCTTGTCTGGCTAAGTCTTATGCCCAGATGTGGCTGCTTCTGTACTTCC  
ACAGAAGAGACCTGCGGCTCATGGCCAACGCCATTTGCTCCGCTGTCCCTGTGAATTGGG  
TCCCTACCGGAAGAACCACGTGGTCCATCCATGCAGGAGGAGAGTGGATGACAACAGAG  
GACATGTTGGAGGTCTGGAACCGTGTGGATAGAGGAGAATGAATGGATGGAAGACAA  
AACCCAGTGGAGAAATGGAGTGACGTCCCATATTCAGGAAAACGAGAGGACATCTGGT  
GTGGCAGCCTGATTGGCACAAGAGCCGAGCCACGTGGGCAGAAAACATCCAGGTGGCTA  
TCAACCAAGTCAGAGCAATCATCGGAGATGAGAAGTATGTGGATTACATGAGTTCACTA  
AAGAGATATGAAGACACAACCTTTGGTTGAGGACACAGTACTGTAGATATTTAATCAATT  
GTAAATAGACAATATAAGTATGCATCTTGGCATTACCCGCGTGCCTTACTTGGCATTAC  
CGCGTGCCTTATAGGAGAGAGAAAAAGACTGATAGGAGAGAGAAAAAGACTGAAAAAGT  
GTAGTTTTATAGTAGTATTTAGTGGTGTAGTGTAATAGTTAAGAAAATTTTGGAGGAG  
AAAGTCAGGCCGGGAAGTTCCCGCCACCGGAAGTTGAGTAGACGGTGCTGCCTGCGACTC  
AACCCAGGAGGACTGGGTGAACAAAGCCGGAAGTGATCCATGTAAGCCCTCAGAACCG

TCTCGGAAGGAGGACCCCACATGTTGTAACCTCAAAGCCCAATGTCAGACCACGCTACGG  
CGTGCTACTCTGCGGAGAGTGCAGTCTGCGATAGTGCCCCAGGAGGACTGGGTAAACAAA  
GGCAAAGTAGGAGAGAGAAAAAGACTGATAGGAGAGAGAAAAAGACTGACTTGGCATT  
ACCGCGTGCCTTACTTGGCATTACCGCGTGCCTTACAACGCCCCACGCGGCCCTAGCCCC  
GGTAATGGTGTAAACCAGGGCGAAAGGACTAGAGGTTAGAGGAGACCCCGCGGTTTAAA  
GTGCACGGCCCAGCCTGGCTGAAGCTGTAGGTCAGGGGAAGGACTAGAGGTTAGTGGAG  
ACCCCGTGCCACAAAACACCACAACAAAACAGCATATTGACACCTGGGATAGACTAGGAG  
ATCTTCTGCTCTGCACAACCAGCCACACGGCACAGTGCGCCGACAATGGTGGCTGGTGGT  
GCGAGAACACAGGATCTCTAGAGTCGAATTGAAAAAGGAAGAGTATGAGTATTCAACAT  
TTCCGTGTCGCCCTTATTCCCTTTTTTGCGGCATTTCCTTCTGTTTTTGGCTACCCAG  
AAACGCTGGTGAAGATAAAGATGCTGAAGATCAGTTGGGTGCACGAGTGGGTACATC  
GAACTGGATCTCAACAGCGGTAAGATCCTTGAGAGTTTTCGCCCCGAAGAACGTTTTCCA  
ATGATGAGCACTTTTAAAGTTCTGCTATGTGGCGCGGTATTATCCCGTGTGACGCCGGG  
CAAGAGCAACTCGGTCGCCGCATACACTATTCTCAGAATGACTTGGTTGAGTACTACCA  
GTCACAGAAAAGCATCTTACGGATGGCATGACAGTAAGAGAATTATGCAGTGTGCCAT  
AACCATGAGTGATAACACTGCGGCCAACTTACTTCTGACAACGATCGGAGGACCGAAGGA  
GCTAACCGCTTTTTTGCACAACATGGGGGATCATGTAACCTGCCTTGATCGTTGGGAACC  
GGAGCTGAATGAAGCCATACCAAACGACGAGCGTGACACCACGATGCCTGCAGCAATGGC  
AACACGTTGCGCAAACATAACTGGCGAACTACTTACTCTAGCTTCCCGGCAACAATT  
AATAGACTGGATGGAGGCGGATAAAGTTGCAGGACCCTTCTGCGCTCGGCCCTCCGGC  
TGGCTGGTTTTATTGCTGATAAATCTGGAGCCGGTGAGCGTGGGTCTCGCGGTATCATTGC  
AGCACTGGGGCCAGATGGTAAGCCCTCCCGTATCGTAGTTATCTACACGACGGGGAGTCA  
GGCAACTATGGATGAACGAAATAGACAGATCGCTGAGATAGGTGCCTCACTGATTAAGC  
ATTGGTAACTGTCAGACCAAGTTTACTCATATATACTTTAGATTGATTTAAAACCTTCAT  
TTTTAATTTAAAAGGATCTAGGTGAAGATCCTTTTTGATAATCTCATGACCAAAATCCC  
TTAACGTGAGTTTTTCGTTCCACTGAGCGTCAGACCCCGTAGAAAAGATCAAAGGATCTTC  
TTGAGATCCTTTTTTTCTGCGCGTAATCTGCTGCTTGCAAACAAAAAACACCGCTACC  
AGCGGTGGTTTTGTTTGGCGGATCAAGAGCTACCAACTCTTTTTCCGAAGGTAACCTGGCTT  
CAGCAGAGCGCAGATACCAAATACTGTCCTTCTAGTGTAGCCGTAGTTAGGCCACCACTT  
CAAGAACTCTGTAGCACCGCCTACATACCTCGCTCTGCTAATCCTGTTACCAGTGGCTGC  
TGCCAGTGGCGATAAGTCGTGCTTACCAGGTTGGACTCAAGACGATAGTTACCAGGATAA  
GGCGCAGCGGTCGGGCTGAACGGGGGGTTCGTGCACACAGCCCAGCTTGGAGCGAACGAC  
CTACACCGAACTGAGATACCTACAGCGTGAGCTATGAGAAAGCGCCACGCTTCCCGAAGG  
GAGAAAGGCGGACAGGTATCCGTAAGCGGCAGGGTCGGAACAGGAGAGCGCACGAGGG  
AGCTTCCAGGGGAAACGCCTGGTATCTTTATAGTCCTGTGCGGTTTTCGCCACCTCTGAC  
TTGAGCGTCGATTTTTGTGATGCTCGTCAGGGGGGCGGAGCCTATGGAAAAACGCCAGCA  
ACGCGGCCCTTTTTACGGTTCCTGGCCTTTTGCTGGCCTTTTGCTCACATGTTCTTTCTGCT  
GTTATCCCCTGATTCTGTGGATAACCGTATTACCGCCTTTGAGTGAGCTGATACCGCTCG  
CCGACCGGAACGACCGAGCGCAGCGAGTCAGTGAGCGAGGAAGCGGAAGAGCGCCTGAT  
GCGGTATTTTCTCCTTACGCATCTGTGCGGTATTTACACCGCATATGGTGCCTCTCAG  
TACAATCTGCTCTGATGCCGCATAGTTAAGCCAGTATACTACTCCGCTATCGCTACGTGAC  
TGGGTGATGGCTGCGCCCCGACACCCGCCAACACCCGCTGACGCGCCCTGACGGGCTTGT  
TGCTCCCGGCATCCGCTTACAGACAAGCTGTGACCGTCTCCGGGAGCTGCATGTGTCAGA  
GGTTTTACCGTTCATACCGAAACGCGCGAGGCAGCTGCGGTAAAGCTCATCAGCGTGGT  
CGTGAAGCGATTACAGATGTCTGCCTGTTTCATCCGCGTCCAGCTCGTTGAGTTTCTCCA  
GAAGCGTTAATGTCTGGCTTCTGATAAAGCGGGCCATGTTAAGGGCGGTTTTTCTGTT

TGGTCACTGATGCCTCCGTGTAAGGGGGATTTCTGTTTCATGGGGGTAATGATACCGATGA  
AACGAGAGAGGATGCTCACGATACGGGTACTGATGATGAACATGCCCGGTTACTGGAA  
CGTTGTGAGGGTAAACAACCTGGCGGTATGGATGCGGCGGGACCAGAGAAAAATCACTCA  
GGGTCAATGCCAGCGCTTCGTTAATACAGATGTAGGTGTTCCACAGGGTAGCCAGCAGCA  
TCCTGCGATGCAGATCCGGAACATAATGGTGCAGGGCGCTGACTTCCGCGTTTCCAGACT  
TTACGAAACACGGAAACCGAAGACCATTTCATGTTGTTGCTCAGGTTCGACAGCGTTTTGCA  
GCAGCAGTCGCTTCACGTTTCGCTCGCGTATCGGTGATTTCATTCTGCTAACCAGTAAGGCA  
ACCCCGCCAGCCTAGCCGGGTCCTCAACGACAGGAGCACGATCATGCGCACCCCGTGGCCA  
GGACCAACGCTGCCCGAAATTTCGAGCTCACGCGTCATCATCATCAT
