# Supplementary material
Source: PubMed Central journal article supplement (PMC5683167)
Supplement: NIHMS914167-supplement-supp_5.pdf [file NIHMS914167-supplement-supp_5.pdf]

GCCGGCAAGAGCTGAGATGTGGAAGTGGAGTGTTACATACACAATGATGTGGAGGCTTGG  
ATGGACCGGTACAAGTATTACCTGAAACGCCACAAGGCCTAGCCAAGATCATTTCAGAAA  
GCTCATAAGGAAGGAGTGTGCGGTCTACGATCAGTTTCCAGACTGGAGCATCAAATGTG  
GGAAGCAGTGAAGGACGAGCTGAACACTCTTTTGAAGGAGAATGGTGTGGACCTTAGTG  
TCGTGGTTGAGAAACAGGAGGGAATGTACAAGTCAGCACCTAAACGCCTCACCGCCACCA  
CGGAAAAATTGGAATTTGGCTGGAAGGCCTGGGGAAAGAGTATTTTATTTGCACCAGAA  
CTCGCCAACAACACCTTTGTGGTTGATGGTCCGGAGACCAAGGAATGTCCGACTCAGAAT  
CGCGCTTGAATAGCTTAGAAGTGGAGGATTTTGGATTTGGTCTCACCCAGCACTCGGATG  
TTCCTGAAGGTCAGAGAGAGCAACACAACCTGAATGTGACTCGAAGATCATTGGAACGGC  
TGTCAGAACAACCTTGGCGATCCACAGTGACCTGTCTTATTGGATTGAAAGCAGGCTCAA  
TGATACGTGGAAGCTTGAAGGGCAGTCTGGGTGAAGTCAAATCATGTACGTGGCCTG  
AGACGCATACCTTGTGGGGCGATGGAATCCTTGAGAGTGACTTGATAATACCAGTCACAC  
TGGCGGGACCACGAAGCAATCACAATCGGAGACCTGGGTACAAGACACAAAACCAGGGCC  
CATGGGACGAAGGCCGGGTAGAGATTGACTTCGATTACTGCCAGGAACTACGGTCACCC  
TGAGTGAGAGCTGCGGACACCGTGGACCTGCCACTCGCACCACCACAGAGAGCGGAAAGT  
TGATAACAGATTGGTGTGCTGCAGGAGCTGCACCTACCACCCTGCGCTACCAAACCTGACA  
GCGGCTGTTGGTATGGTATGGAGATCAGACCACAGAGACATGATGAAAAGACCCTCGTG  
CAGTCACAAGTGAATGCTTATAATGCTGATATGATTGACCCTTTTCAGTTGGGCCTTCTG  
GTCGTGTTCTTGGCCACCCAGGAGTCTTTCGCAAGAGGTGGACAGCCAAGATCAGCATG  
CCAGCTATACTGATTGCTCTGCTAGTCTGGTGTGGGGGCATTACTTACACTGATGTG  
TTACGCTATGTCATCTTGGTGGGGGCAGCTTTCGCAGAATCTAATTCGGGAGGAGACGTG  
GTACACTTGGCGCTCATGGCGACCTTCAAGATACAACCAGTGTATGGTGGCCTCGTTT  
CTCAAAGCGAGATGGACCAACCAGGAGAACATTTTGTGATGTTGGCGGCTGTTTTCTTT  
CAAATGGCTTATTACGATGCCCGCCAAATTTCTGCTCTGGGAGATCCCTGATGTGTTGAAT  
TCACTGGCGGTAGCTTGGATGATACTGAGAGCCATAACATTCACAACGACATCAAACGTG  
GTTGTTCCGCTGCTAGCCCTGCTAACACCCGGGCTGAGATGCTTGAATCTGGATGTGTAC  
AGGATACTGCTGTTGATGGTTCGGAATAGGCAGCTTGCATCAGGGAGAAGAGGAGTGCAGC  
TGCAAAAAGAAAGGAGCAAGTCTGCTATGCTTGGCTCTAGCCTCAACAGGACTTTTCA  
ACCCCATGATCCTTGTGCTGGACTGATTGCATGTGATCCCAACCGTAAACGCGGATGGC  
CCGCAACTGAAGTGATGACAGCTGTGCGCCTAATGTTTGGCATCGTCGGAGGGCTGGCAG  
AGCTTGACATTGACTCCATGGCCATTCCAATGACTATCGCGGGGCTCATGTTTGTGCTGCTT  
TCGTGATTTCTGGGAAATCAACAGATATGTGGATTGAGAGAACGGCGGACATTTCTGG  
GAAAGTGATGCAGAAATTACAGGCTCGAGCGAAAGAGTTGATGTGCGGCTTGTGATGA  
TGAAACTTCCAGCTCATGAATGATCCAGGAGCACCTTGAAGATATGGATGCTCAGAA  
TGGTCTGTCTCGGATTAGTTCGTACACCCCTGGGCAATCTTGCCCTCAGTAGTTGGAT  
TTTGGATAACTCTCCAATACACAAAGAGAGGAGGCGTGTGTGGGACACTCCCTCACCAA  
AGGAGTACAAAAGGGGGACACGACCACCGGCTCTACAGGATCATGACTCGTGGGCTGC  
TCGGCAGTTATCAAGCAGGAGCGGGCGTGATGGTTGAAGGTGTTTTCCACACCCTTTGGC  
ATACAACAAAAGGAGCCGCTTTGATGAGCGGAGAGGGCCGCTGGACCCATACTGGGGCA  
GTGTCAAGGAGGATCGACTTTGTTACGGAGGACCCTGGAAATTGCAGCACAAGTGGAAC  
GGGCAGGATGAGGTGCAGATGATTGTGGTGGAACTGGCAGGAACGTTAAGAACGTCCA  
GACGAAACCAGGGGTGTTCAAAACACCTGAAGGAGAAATCGGGGCCGTGACTTTGGACT  
TCCCCACTGGAACATCAGGCTCACCAATAGTGGACAAAAACGGTGTGATGATTGGGCTTT  
ATGGCAATGGAGTCATAATGCCCAACGGCTCATACATAAGCGCGATAGTGCAGGGTGAA  
AGGATGGATGAGCCAATCCAGCCGATTCGAACCTGAGATGCTGAGGAAAAACAGAT  
CACTGTACTGGATCTCCATCCCGGCCCGGTAACAAGGAGGATTCTGCCACAGATCAT

CAAAGAGGCCATAAACAGAAGACTGAGAACAGCCGTGCTAGCACCAACCAGGGTTGTGG  
CTGCTGAGATGGCTGAAGCACTGAGAGGACTGCCCATCCGGTACCAGACATCCGCAGTGC  
CCAGAGAACATAATGGAAATGAGATTGTTGATGTCATGTGTCATGCTACCCTCACCCACA  
GGCTGATGTCTCCTCACAGGGTGCCGAACATAACCTGTTCTGATGGATGAGGCTCATT  
TCACCGACCCAGCTAGCATTGCAGCAAGAGGTTACATTTCCACAAAGGTCGAGCTAGGGG  
AGGCGGCGGCAATATTCATGACAGCCACCCACCAGGCACTTCAGATCCATTCCCAGAGT  
CCAATTCACCAATTTCCGACTTACAGACTGAGATCCCGGATCGAGCTTGGAACCTGGAT  
ACGAATGGATCACAGAATACACCGGGAAGACGGTTTTGGTTTTGTGCCTAGTGTCAAGATG  
GGGAATGAGATTGCCCTTTGCCTACAACGTGCTGGAAAGAAAGTAGTCCAATTGAACAG  
AAAGTCGTACGAGACGGAGTACCCAAAATGTAAGAACGATGATTGGGACTTTGTTATCA  
CAACAGACATATCTGAAATGGGGGCTAACTTCAAGGCGAGCAGGGTGATTGACAGCCGG  
AAGAGTGTGAAACCAACCATCATAACAGAAGGAGAAGGGAGAGTGATCCTGGGAGAACC  
ATCTGCAGTGACAGCAGCTAGTGCCGCCAGAGACGTGGACGTATCGGTAGAAATCCGTC  
GCAAGTTGGTGATGAGTACTGTTATGGGGGACACGAATGAAGACGACTCGAACTTCG  
CCCATTGGACTGAGGCACGAATCATGCTGGACAACATCAACATGCCAAACGGACTGATCG  
CTCAATTCTACCAACCAGAGCGTGAGAAGGTATATACCATGGATGGGGAATACCGGCTCA  
GAGGAGAAGAGAGAAAAAACTTTCTGGAAGTGTGAGGACTGCAGATCTGCCAGTTTGG  
CTGGCTTACAAGGTTGCAGCGGCTGGAGTGTACATACCACGACCGGAGGTGGTGTCTTATG  
GGTCTAGGACAAACACAATTTTAGAAGACAACAACGAAGTGAAGTCATCACGAAGCT  
TGGTGAAGGAAGATTCTGAGGCCGCGCTGGATTGACGCCAGGGTGTACTCGGATCACCA  
GGCACTAAAGGCGTTCAAGGACTTCGCCTCGGGAAAACGTTCTCAGATAGGGCTCATTGA  
GGTCTGGGAAAGATGCCTGAGCACTTCATGGGGAAGACATGGGAAGCACTTGACACCA  
TGTACGTTGTGGCCACTGCAGAGAAAGGAGGAAGAGCTCACAGAATGGCCCTGGAGGAA  
CTGCCAGATGCTCTTCAGACAATTGCCTTGATTGCCTTATTGAGTGTGATGACCATGGGA  
GTATTCTTCCTCCTCATGCAGCGGAAGGGCATTGGAAGATAGGTTTGGGAGGCGCTGTC  
TTGGGAGTCGCGACCTTTTTCTGTTGGATGGCTGAAGTTCAGGAACGAAGATCGCCGGA  
ATGTTGCTGCTCTCCCTTCTTTGATGATTGTGCTAATTCCTGAGCCAGAGAAGCAACGT  
TCGCAGACAGACAACCAGCTAGCCGTGTTCTGATTTGTGTCATGACCCTTGTGAGCGCA  
GTGGCAGCCAACGAGATGGGTTGGCTAGATAAGACCAAGAGTGACATAAGCAGTTTGT  
TGGGCAAAGAATTGAGGTCAAGGAGAATTTAGCATGGGAGAGTTTCTTTTGGACTTGA  
GGCCTGCAACAGCCTGGTCACTGTACGCTGTGACAACAGCGGTCCTCACTCCACTGCTAA  
AGCATTGATCACGTCAGATTACATCAACACCTCATTGACCTCAATAAACGTTTCAGGCAA  
GTGCACTATTCACACTCGCGCGAGGCTTCCCCTTCGTCGATGTTGGAGTGTGCGCTCTCC  
TGCTAGCAGCCGGATGCTGGGGACAAGTCACCCTCACCGTTACGGTAACAGCGGCAACAC  
TCCTTTTTTGGCACTATGCCTACATGGTTCCCGGTTGGCAAGCTGAGGCAATGCGCTCAG  
CCCAGCGGCGGACAGCGGCCGGAATCATGAAGAACGCTGTAGTGGATGGCATCGTGGCCA  
CGGACGTCCCAGAATTAGAGCGCACCCACACCCATCATGCAGAAGAAAGTTGGACAGATCA  
TGCTGATCTTGGTGTCTCTAGCTGCAGTAGTAGTGAACCCGTCTGTGAAGACAGTACGAG  
AAGCCGGAATTTTGATCACGGCCGAGCGGTGACGCTTTGGGAGAATGGAGCAAGCTCTG  
TTTGGAAACGCAACAACTGCCATCGGACTCTGCCACATCATGCGTGGGGGTTGGTTGTCAT  
GTCTATCCATAACATGGACACTCATAAAGAACATGGAAAAACCAGGACTAAAAAGAGGT  
GGGGCAAAGGACGCACCTTGGGAGAGGTTTGGAAAGAAAGACTCAACCAGATGACAAA  
AGAAGAGTTCACTAGGTACCGCAAAGAGGCCATCATCGAAGTCGATCGCTCAGCGGCAA  
AACACGCCAGGAAAGAAGGCAATGTCCTGGAGGGCATCCAGTCTCTAGGGGCACAGCA  
AAACTGAGATGGCTGGTTCGAACGGAGGTTTCTCGAACCGGTCGGAAAAGTGATTGACCT  
TGGATGTGGAAGAGCGGTTGGTGTACTATATGGCAACCCAAAAAAGAGTCCAAGAAG

TCAGAGGGTACACAAAGGGCGGTCCCGGACATGAAGAGCCCCAACTAGTGCAAAGTTAT  
GGATGGAACATTGTACCCATGAAGAGTGGAGTGGATGTGTTCTACAGACCTTCTGAGTG  
TTGTGACACCCTCCTTTGTGACATCGGAGAGTCTCGTCAAGTGCTGAGGTTGAAGAGCA  
TAGGACGATTCCGGTCTTGAAATGGTTGAGGACTGGCTGCACCGAGGGCCAAGGGAAT  
TTTGGGTGAAGGTGCTCTGCCCTACATGCCGAAAGTCATAGAGAAGATGGAGCTGCTCC  
AACGCCGTATGGGGGGGACTGGTCAGAAACCCACTCTCACGGAATTCACGCACGAGA  
TGTATTGGGTGAGTCGAGCTTCAGGCAATGTGGTACATTCAGTGAATATGACCAGCCAG  
GTGCTCCTAGGAAGAATGGAAAAAGGACCTGGAAGGGACCCAATACGAGGAAGATGT  
AACTTGGGAAGTGGAACCAGGGCGGTGGGAAAACCCCTGCTCAACTCAGACACCAGTA  
AAATCAAGAACAGGATTGAACGACTCAGGCGTGAGTACAGTTCGACGTGGCACCACGAT  
GAGAACCACCCATATAGAACCTGGAACCTATCACGGCAGTTATGATGTGAAGCCCACAGGC  
TCCGCCAGTTCGCTGGTCAATGGAGTGGTCAGGCTCCTCTCAAACCATGGGACACCATC  
ACGAATGTTACCACCATGGCCATGACTGACACTACTCCCTTCGGGCAGCAGCGAGTGTTT  
AAAGAGAAGGTGGACACGAAAGCTCCTGAACCGCCAGAAGGAGTGAAGTACGTGCTCAA  
CGAGACCACCAACTGGTTGTGGGCGTTTTTGGCCAGAGAAAAACGTCCCAGAATGTGCTC  
TCGAGAGGAATTCATAAGAAAGGTCAACAGCAATGCAGCTTTGGGTGCCATGTTTGAAG  
AGCAGAATCAATGGAGGAGCGCCAGAGAAGCAGTTGAAGATCCAAAATTTTGGGAGATG  
GTGGATGAGGAGCGGAGGCACATCTGCGGGGGAATGTCACACTTGCATTTACAACAT  
GATGGGAAAGAGAGAGAAAAAACCCGGAGAGTTCGGAAAGGCCAAGGGAAGCAGAGCCA  
TTTGGTTCATGTGGCTCGGAGCTCGCTTTCTGGAGTTCGAGGCTCTGGGTTTTCTCAATG  
AAGACCACTGGCTTGGAAAGAAAGAACTCAGGAGGAGGTGTCGAGGGCTTGGGCCTCAA  
AACTGGGTTACATCCTGCGTGAAGTTGGCACCCGGCCTGGGGCAAGATCTATGCTGAT  
GACACAGCTGGCTGGGACACCCGCATCACGAGAGCTGACTTGGAAAATGAAGCTAAGGT  
GCTTGAGCTGCTTGATGGGGAACATCGGCGTCTTGCCAGGGCCATCATTGAGCTCACCTA  
TCGTCAAAAGTTGTGAAAGTGATGCGCCCGCTGCTGATGGAAGAACCGTCATGGATG  
TTATCTCCAGAGAAGATCAGAGGGGGAGTGGACAAGTTGTCACCTACGCCCTAAACACTT  
TCACCAACCTGGCCGTCCAGCTGGTGAGGATGATGGAAGGGGAAGGAGTGATTGGCCCA  
GATGATGTGGAGAACTCACAAAAGGGAAGGACCCAAAGTCAGGACCTGGCTGTTTGA  
GAATGGGGAAGAAAGACTCAGCCGCATGGCTGTCAGTGGAGATGACTGTGTGGTAAAGC  
CCCTGGACGATCGCTTTGCCACCTCGCTCCACTTCTCAATGCTATGTCAAAGGTTTCGCA  
AAGACATCCAAGAGTGGAACCGTCAACTGGATGGTATGATTGGCAGCAGGTTCCATTT  
TGCTCAAACCATTTCACTGAATTGATCATGAAAGATGGAAGAACACTGGTGGTTCCATG  
CCGAGGACAGGATGAATTGGTAGGCAGAGCTCGCATATCTCCAGGGCCGGATGGAACG  
TCCGCGACACTGCTTGTCTGGCTAAGTCTTATGCCCAGATGTGGCTGCTTCTGTACTTCC  
ACAGAAGAGACCTGCGGCTCATGGCCAACGCCATTTGCTCCGCTGTCCCTGTGAATTGGG  
TCCCTACCGGAAGAACCACGTGGTCCATCCATGCAGGAGGAGAGTGGATGACAACAGAG  
GACATGTTGGAGGTCTGGAACCGTGTGGATAGAGGAGAATGAATGGATGGAAGACAA  
AACCCAGTGGAGAAATGGAGTGACGTCCCATATTCAGGAAAACGAGAGGACATCTGGT  
GTGGCAGCCTGATTGGCACAAGAGCCGAGCCACGTGGGCAGAAAACATCCAGGTGGCTA  
TCAACCAAGTCAGAGCAATCATCGGAGATGAGAAGTATGTGGATTACATGAGTTCACTA  
AAGAGATATGAAGACACAACCTTTGGTTGAGGACACAGTACTGTAGATATTTAATCAATT  
GTAAATAGACAATATAAGTATGCATCTTGGCATTACCCGCGTGCCTTACTTGGCATTAC  
CGCGTGCCTTATAGGAGAGAGAAAAAGACTGATAGGAGAGAGAAAAAGACTGAAAAAGT  
GTAGTTTTATAGTAGTATTTAGTGGTGTAGTGTAATAGTTAAGAAAATTTTGGAGGAG  
AAAGTCAGGCCGGGAAGTTCCCGCCACCGGAAGTTGAGTAGACGGTGCTGCCTGCGACTC  
AACCCAGGAGGACTGGGTGAACAAAGCCGGAAGTGATCCATGTAAGCCCTCAGAACCG

TCTCGGAAGGAGGACCCACATGTTGTAACCTCAATAGGAGAGAGAAAAAGACTGATAG  
GAGAGAGAAAAAGACTGACTTGGCATTACACCGGTGCCTTACTTGGCATTACACCGGTGC  
CTTAAGCCCAATGTCAGACCACGCTACGGCGTGCTACTCTGCGGAGAGTGCAGTCTGCGA  
TAGTGCCCCAGGAGGACTGGGTAAACAAAGGCAAACCAACGCCCCACGCGGCCCTAGCCC  
CGGTAATGGTGTAAACCAGGGCGAAAGGACTAGAGGTTAGAGGAGACCCCGCGGTTTAA  
AACACCATAGGAGAGAGAAAAAGACTGATAGGAGAGAGAAAAAGACTGACTTGGCATT  
CACCGGTGCCTTACTTGGCATTACACCGGTGCCTTAGTGCACGGCCAGCCTGGCTGAA  
GCTGTAGGTCAGGGGAAGGACTAGAGGTTAGTGGAGACCCCGTGCCACAAAACACCACA  
ACAAAACAGCATATTGACACCTGGGATAGACTAGGAGATCTTCTGCTCTGCACAACCAGC  
CACACGGCACAGTGCGCCGACAATGGTGGCTGGTGGTGGCAGAACACAGGATCTCTAGAG  
TCGAATTGAAAAAGGAAGAGTATGAGTATTCAACATTTCCGTGTGCGCCCTTATTCCTTT  
TTTGGCGCATTTTGCCTTCTGTTTTTGGCTACCCAGAAACGCTGGTGAAGTAAAAGAT  
GCTGAAGATCAGTTGGGTGCACGAGTGGGTACATCGAACTGGATCTCAACAGCGGTAA  
GATCCTTGAGAGTTTTCGCCCCGAAGAACGTTTTTCCAATGATGAGCACTTTTAAAGTTCT  
GCTATGTGGCGCGGTATTATCCCGTGTGACGCCGGCAAGAGCAACTCGGTGCGCCGAT  
ACACTATTCTCAGAATGACTTGGTTGAGTACTACCAGTCACAGAAAAGCATCTTACGGA  
TGGCATGACAGTAAGAGAATTATGCAGTGTGCCATAACCATGAGTGATAAACTGCGG  
CCAACCTACTTCTGACAACGATCGGAGGACCGAAGGAGCTAACCGCTTTTTTGCACAACA  
TGGGGGATCATGTAACCTGCCTTGATCGTTGGGAACCGGAGCTGAATGAAGCCATACCAA  
ACGACGAGCGTGACACCACGATGCCTGCAGCAATGGCAACAACGTTGCGCAAATTTAA  
CTGGCGAACTACTTACTCTAGCTTCCCGGCAACAATTAATAGACTGGATGGAGGCGGATA  
AAGTTGCAGGACCACTTCTGCGCTCGGCCCTTCCGGCTGGCTGGTTTTATTGCTGATAAAT  
CTGGAGCCGGTGAGCGTGGGTCTCGCGGTATCATTGCAGCACTGGGGCCAGATGGTAAGC  
CCTCCCGTATCGTAGTTATCTACACGACGGGAGTCAGGCAACTATGGATGAACGAAATA  
GACAGATCGCTGAGATAGGTGCCTCACTGATTAAGCATTGGTAACTGTCAGACCAAGTTT  
ACTCATATATACTTTAGATTGATTTAAAACCTCATTTTTAATTTAAAAGGATCTAGGTG  
AAGATCCTTTTTGATAATCTCATGACCAAAATCCCTAACGTGAGTTTTCGTTCCTACTGA  
GCGTCAGACCCCGTAGAAAAGATCAAAGGATCTTCTTGAGATCCTTTTTTTCTGCGCGTA  
ATCTGCTGCTTGCAAACAAAAAAACCACCGTACCAGCGGTGGTTTGTGTTGCCGGATCAA  
GAGCTACCAACTTTTTTCCGAAGGTAACCTGGCTTACAGCAGAGCGCAGATACCAAATACT  
GTCCTTCTAGTGTAGCCGTAGTTAGGCCACCACTTCAAGAACTCTGTAGCACCCGCTACA  
TACCTCGCTCTGCTAATCCTGTTACCAGTGGCTGCTGCCAGTGGCGATAAGTCGTGTCTT  
ACCGGGTTGGACTCAAGACGATAGTTACCGGATAAGGCGCAGCGGTGCGGCTGAACGGG  
GGGTTTCGTGCACACAGCCAGCTTGGAGCGAACGACCTACACCGAACTGAGATACCTACA  
GCGTGAGCTATGAGAAAGCGCCACGCTTCCCGAAGGGAGAAAGGCGGACAGGTATCCGG  
TAAGCGGCAGGGTTCGGAACAGGAGAGCGCACGAGGGAGCTTCCAGGGGGAAACGCCTGG  
TATCTTTATAGTCCTGTGCGGTTTTCGCCACCTCTGACTTGAGCGTCGATTTTTGTGATGC  
TCGTCAGGGGGGCGGAGCCTATGGAAAAACGCCAGCAACGCGGCCTTTTTACGGTTCCTG  
GCCTTTTGTGCTGGCCTTTTGTCTCATGTTCTTTCCTGCGTTATCCCCTGATTCTGTGGAT  
AACCGTATTACCGCCTTTGAGTGAGCTGATACCGCTCGCCGACGCCGAACGACCGAGCGC  
AGCGAGTCAGTGAGCGAGGAAGCGGAAGAGCGCCTGATGCGGTATTTTCTCCTTACGCAT  
CTGTGCGGTATTTACACCGCATATGGTGCACCTCTCAGTACAATCTGCTCTGATGCCGCA  
TAGTTAAGCCAGTATACACTCCGCTATCGCTACGTGACTGGGTCATGGCTGCGCCCCGAC  
ACCCGCCAACACCCGCTGACGCGCCCTGACGGGCTTGTCTGCTCCCGGCATCCGCTTACAG  
ACAAGCTGTGACCGTCTCCGGGAGCTGCATGTGTGAGAGGTTTTACCGTCATCACCGAA  
ACGCGCGAGGACGCTGCGGTAAAGCTCATCAGCGTGGTCTGAAGCGATTACAGATGTC

TGCCTGTTTCATCCGCGTCCAGCTCGTTGAGTTTCTCCAGAAGCGTTAATGTCTGGCTTCT  
GATAAAGCGGGCCATGTTAAGGGCGGTTTTTTCCTGTTTGGTCACTGATGCCTCCGTGTA  
AGGGGGATTTCTGTTTCATGGGGGTAATGATACCGATGAAACGAGAGAGGATGCTCACGA  
TACGGGTACTGATGATGAACATGCCCGTTACTGGAACGTTGTGAGGGTAAACAACG  
GCGGTATGGATGCGGCGGGACCAGAGAAAAATCACTCAGGGTCAATGCCAGCGCTTCGTT  
AATACAGATGTAGGTGTTCCACAGGGTAGCCAGCAGCATCCTGCGATGCAGATCCGGAAC  
ATAATGGTGCAGGGCGCTGACTTCCGCGTTTCCAGACTTTACGAAACACGGAAACCGAAG  
ACCATTTCATGTTGTTGCTCAGGTCGCAGACGTTTTGCAGCAGCAGTCGCTTCACGTTTCGC  
TCGCGTATCGGTGATTCATTCTGCTAACCAGTAAGGCAACCCCGCCAGCCTAGCCGGGTC  
CTCAACGACAGGAGCACGATCATGCGCACCCCGTGGCCAGGACCCAACGCTGCCCCGAAATT  
CGAGCTCACGCGTCATCATCATCAT
